# Supplementary material
Source: PubMed Central journal article supplement (PMC2784107)

# Supplementary Information

## **ESI-MS, DFT and Synthetic Studies on the H<sub>2</sub>-Mediated Coupling of Acetylene: Insertion of C=X Bonds into Rhodacyclopentadienes and Brønsted Acid Cocatalyzed Hydrogenolysis of Organorhodium Intermediates**

Vanessa M. Williams, Jong Rock Kong, Byoung Joon Ko, Yogita Mantri, Jennifer S. Brodbelt,\* Mu-Hyun Baik,\* and Michael J. Krische\*

*University of Texas at Austin, Department of Chemistry and Biochemistry, Austin, TX 78712, USA*  
*Indiana University, Department of Chemistry, Bloomington, IN 47405, USA*  
E-mail: jbrodbelt@mail.utexas.edu; mbaik@indiana.edu; mkrische@mail.utexas.edu

### **Experimental Section**

|                                                       |           |
|-------------------------------------------------------|-----------|
| General Experimental Details-----                     | S2        |
| Experimental Apparatus-----                           | S3        |
| Preparation and Spectroscopic Data for Compounds----- | S4 - S19  |
| DFT Data-----                                         | S20 – S41 |

**General Experimental Details.** All reactions were run under an atmosphere of argon, unless otherwise indicated. Anhydrous solvents were transferred by oven-dried syringe. Flasks were flame-dried and cooled under a stream of nitrogen. Toluene was distilled from sodium and benzophenone. 1,2 Dichloroethane was distilled from calcium hydride. BIPHEP and *rac*-BINAP were used as received from Strem Chemicals. Triphenylacetic acid was used as received from Aldrich. Acetylene Gas was used as received from PRAXAIR (Atomic Absorption Grade). [Rh(cod)<sub>2</sub>]SbF<sub>6</sub>, and [Rh(cod)<sub>2</sub>]BARF were prepared in analogy with previously reported procedures.<sup>1</sup> Analytical thin-layer chromatography (TLC) was carried out using 0.2-mm commercial silica gel plates (DC-Fertigplatten Kieselgel 60 F<sub>254</sub>). Preparative column chromatography employing silica gel was performed according to the method of Still.<sup>2</sup> Solvents for chromatography are listed as volume: volume ratios. Infrared spectra were recorded on a Perkin-Elmer 1600 spectrometer. High-resolution mass spectra (HRMS) were obtained on a Karatos MS9 and are reported as m/z (relative intensity). Accurate masses are reported for the molecular ion [M + 1] or a suitable fragment ion. Melting points were obtained on a Thomas-Hoover Unimelt apparatus and are uncorrected. Proton nuclear magnetic resonance (H-NMR) spectra were recorded with a Varian Gemini (400 MHz or 300MHz) spectrometer. Chemical shifts are reported in delta (δ) units, parts per million (ppm) downfield from trimethylsilane. Coupling constants are reported in Hertz (Hz). Carbon-13 nuclear magnetic resonance (C13-NMR) spectra were recorded with a Varian Gemini 300 (75 MHz) or 400 (100 MHz) spectrometer. Chemical shifts are reported in delta (δ) units, ppm relative to the center of the triplet at 77.0 ppm for deuteriochloroform. C13 NMR spectra were routinely run with broadband decoupling. Compounds **11a**, **11b**, and **12a**,<sup>3</sup> **14a**,<sup>4</sup> **15a**,<sup>5</sup> and *deuterio*-triethylsilane<sup>6</sup> were prepared according to the cited references and were consistent with literature characterization data.

---

<sup>1</sup> Guzel, B.; Omary, M.; Fackler, J.P., Jr.; Akegerman, A. *Inorg. Chim. Acta* **2001**, 325, 45.

<sup>2</sup> Still, W.C.; Kahn, M.; Mitra, A. *J. Org. Chem.* **1978**, 43, 2923.

<sup>3</sup> Kong, J.-R.; Krische, M. J. *J. Am. Chem. Soc.* **2006**, 128, 16041.

<sup>4</sup> Wang, X.; Bhatia P.A.; Daanen, J.F.; Latsaw, S.P.; Rohde, J.; Kolasa, T.; Hakeem, A.A.; Matulenko, M.A.; Nakane, M.; Uchic, M.E.; Miller, L.N.; Chang, R.; Moreland, R.B.; Brioni, J.D.; Stewart, A.O. *Bioorg. & Med. Chem.* **2005**, 13, 4667.

<sup>5</sup> Yonezawa, Y.; Shin, C.; Ono, Y.; Yoshimura, J. *Bull. Chem. Soc. Jpn.* **1980**, 53, 2905.

<sup>6</sup> Caseri, W.; Pregosin, P. S. *J. Organomet. Chem.* **1988**, 2, 259.

## Experimental Apparatus

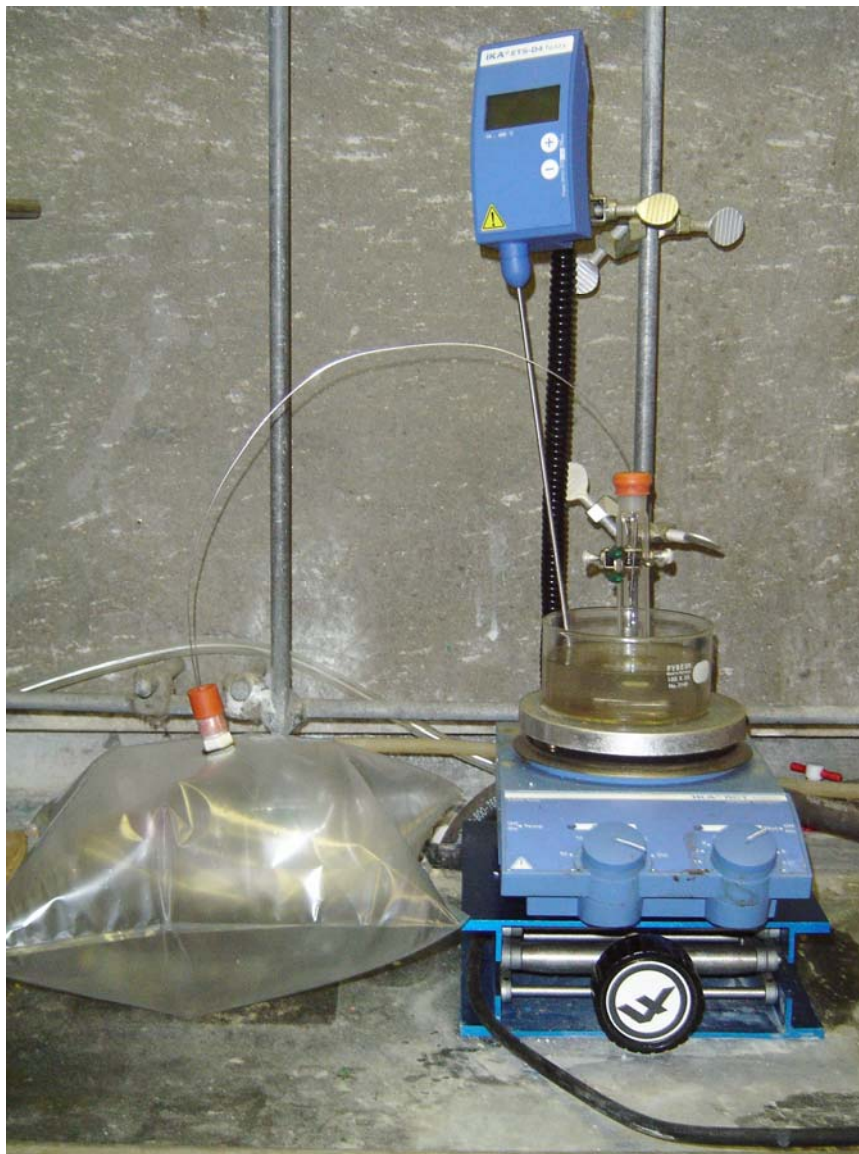

- 1) Reaction Vessel: 2.0 cm (Diameter) \* 13.0 cm (Length)
- 2) Gas Bag: Tedlar® Gas Sampling Bag (Aldrich)
- 3) Cannula (Double-Tipped Needle): 24 in. (Length) – 20 (Gauge)

## Preparation and Spectroscopic Data for Compounds.

**Conversion of 12a to 12b.** To an oven dried test tube (18 x 150 mm) equipped with stir bar and charged with Rh(COD)<sub>2</sub>SbF<sub>6</sub> (5.5 mg, 0.01 mmol, 5 mol%), BIPHEP (5.3mg, 0.01 mmol, 5 mol%), triphenylacetic acid (2.9 mg, 0.01 mmol, 5 mol%), and Na<sub>2</sub>SO<sub>4</sub> (58 mg, 0.4 mmol, 100 mol%) was added dichloroethane (1.2 mL), and stirred for 30 minutes at room temperature. A solution of **12a** (42mg, 0.2 mmol, 100 mol%) and carbonyl substrate **2a** (45.6 mg, 0.2 mmol, 100 mol%) in dichloroethane (0.8 mL, reaction is 0.1 M with respect to **2a**) was added to the reaction vessel under 1 atm of hydrogen. The mixture was stirred at 45 °C under 1 atm of hydrogen. After 24 hours, a solution of 1,6-diyne (42 mg, 0.2mmol, 100 mol%) in dichloroethane (1 mL) was added to the reaction vessel. The mixture was stirred at 45 °C under 1 atm of hydrogen for an additional 18 hours. The reaction mixture was concentrated *in vacuo* and purified by flash column chromatography (SiO<sub>2</sub>, ethyl acetate: dichloromethane: hexanes, 1:6:12) to afford title compound **12b** (49.8 mg, 0.12 mmol) as a colorless oil in 58 % yield.

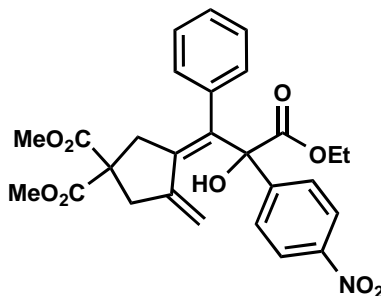

**<sup>1</sup>H NMR (400 MHz, CDCl<sub>3</sub>):** δ 8.06 (d, *J* = 8.8 Hz, 2H), 7.76 (d, *J* = 9.2 Hz, 2H), 7.32-7.19 (m, 5H), 5.43 (s, 1H), 4.86 (s, 1H), 4.84 (s, 1H), 3.78 (s, 3H), 3.76-3.68 (m, 1H), 3.64 (s, 3H), 3.50-3.42 (m, 1H), 2.91 (d, *J* = 16.8 Hz, 1H), 2.87 (d, *J* = 14.0 Hz, 1H), 2.78 (d, *J* = 15.6 Hz, 1H), 2.66 (d, *J* = 16.8 Hz, 1H), 0.85 (t, *J* = 7.2 Hz, 3H).

**<sup>13</sup>C NMR (100 MHz, CDCl<sub>3</sub>):** δ 173.3, 172.0, 171.3, 148.3, 147.2, 141.5, 141.0, 140.5, 135.9, 128.8, 128.3, 127.2, 123.0, 122.5, 117.6, 81.1, 63.2, 56.1, 52.9, 52.8, 41.7, 41.4, 13.3.

**HRMS (CI):** Calcd. For C<sub>14</sub>H<sub>23</sub>NO<sub>5</sub> [M+1]: 286.1654, Found: 286.1654.

**FTIR (neat):** 3467, 2991, 2949, 2948, 2844, 1730, 1596, 1519, 1488, 1437, 1341, 1242, 1203, 1173, 1134, 1078.

**R<sub>f</sub>**=0.2 ethyl acetate: dichloromethane: hexanes, 1:6:12.

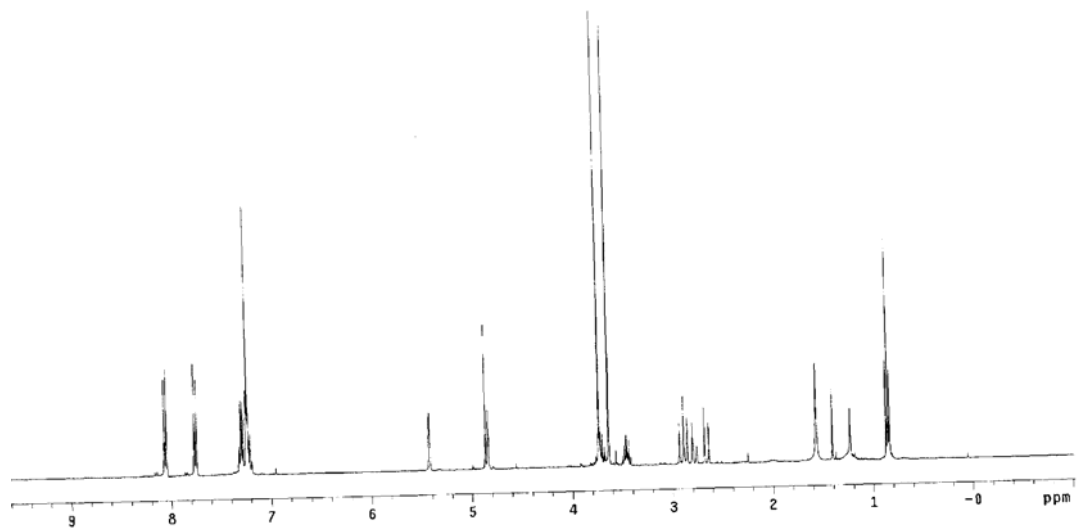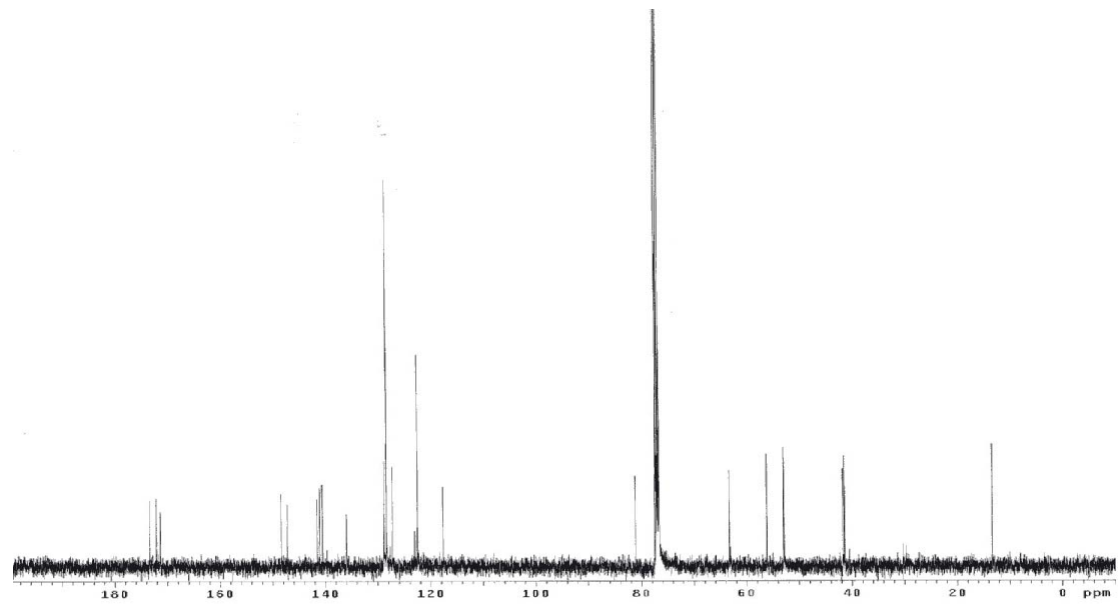

**Procedure for preparation of (Z)-2-(2-oxohexa-3,5-dienyl)isoindoline-1,3-dione (14b).** To an oven dried test tube (18 x 150 mm) equipped with stir bar and charged with aldehyde **14a** (38 mg, 0.2 mmol, 100 mol%), *rac*-BINAP (6.2 mg, 0.01 mmol, 5 mol%), and Rh(COD)<sub>2</sub>BARF (11.8 mg, 0.01 mmol, 5 mol%) was added dichloroethane (2.0 mL, 0.1 M with respect to **14a**). The resulting solution was sparged with argon for 1 minute and acetylene was introduced to the reaction vessel using a balloon with 20G needle. The mixture was heated to 45 °C for 18 hours, at which point the reaction mixture was allowed to cool to room temperature. The reaction mixture was concentrated *in vacuo* and purified by flash column chromatography (SiO<sub>2</sub>: ethyl acetate: hexanes, 15:85) to furnish **14b** (27 mg, 0.11 mmol) as a cream colored solid in 52% yield.

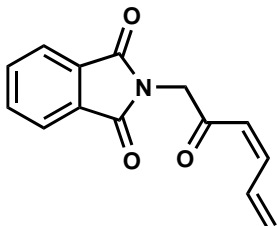

**<sup>1</sup>H NMR** (400 MHz, CDCl<sub>3</sub>): δ 7.91-7.86 (m, 2H), 7.77-7.72 (m, 2H), 7.64-7.51 (m, 1H), 6.58 (t, *J* = 11.18 Hz, 1H), 6.11 (d, *J* = 11.18 Hz, 1H), 5.63 (d, *J* = 17.8 Hz, 1H), 5.59 (d, *J* = 10.3 Hz, 1H), 4.76 (s, 2H).

**<sup>13</sup>C NMR** (100 MHz, CDCl<sub>3</sub>): δ 191.5, 167.7, 145.6, 134.1, 132.1, 128.9, 128.1, 123.5, 120.6, 47.5.

**HRMS (CI):** Calcd. for C<sub>14</sub>H<sub>12</sub>NO<sub>3</sub> [*M*+1]: 242.0817, Found: 242.0821.

**FTIR (neat):** 2926, 2848, 1751, 1714, 1695, 1413, 1387, 1308, 1088, 945, 712 cm<sup>-1</sup>.

**M.P.:** 100 – 102 °C (crystals from ethyl acetate: hexanes).

**R<sub>f</sub>:** 0.46 ethyl acetate:hexanes, 1:1.

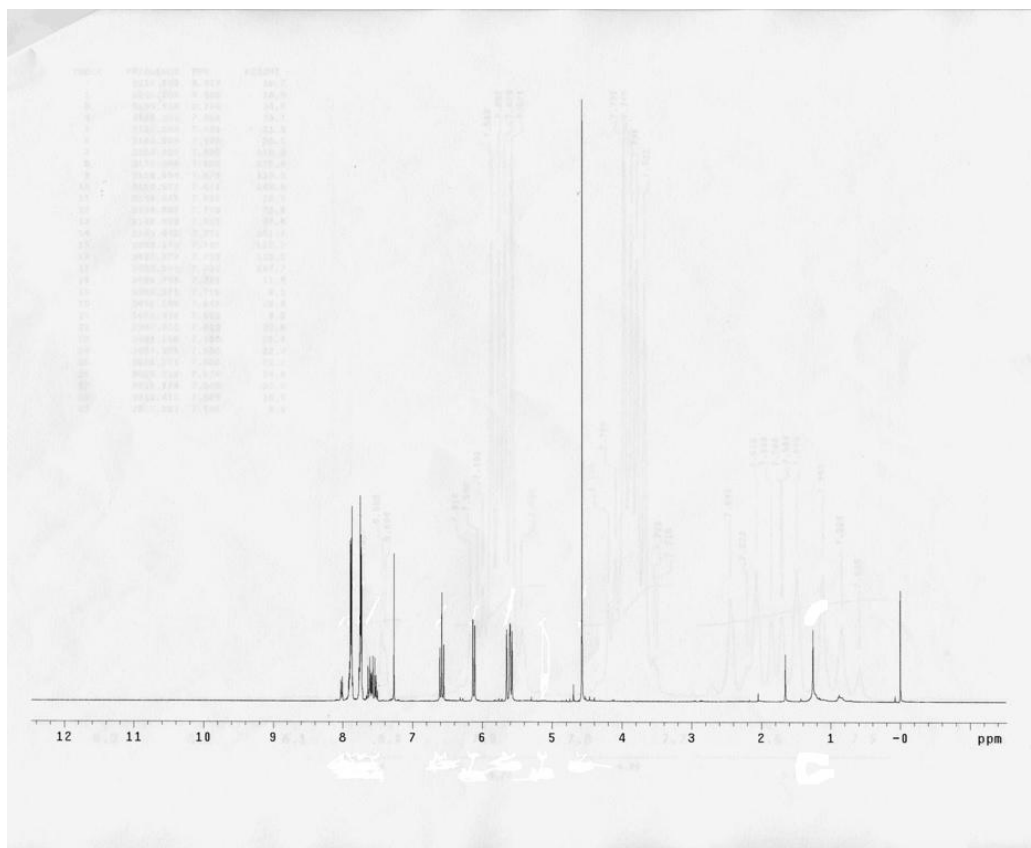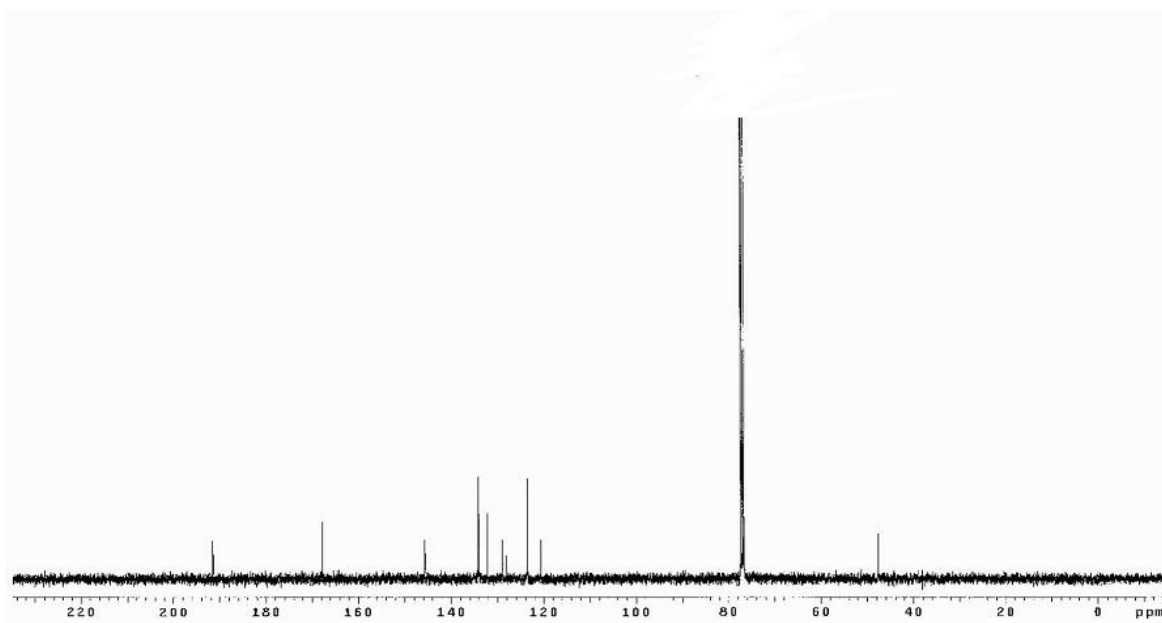

**Procedure for the preparation of (S)-ethyl 2-(1,3-dioxoisindolin-2-yl)ethanethioate.** In accordance with the method of Steglich,<sup>3</sup> to a 50 mL round bottomed flask equipped with stir bar and charged with *N,N*-phthalimidoglycine (2.05 g, 10 mmol, 100 mol%) was added dichloromethane (10 mL, 1 M) followed by 4-*N,N*-dimethylaminopyridine (75 mg, 0.5 mmol, 5 mol%). The solution was cooled to 0 °C and ethanethiol (2.16 mL, 30 mmol, 300 mol %) was added followed by dicyclohexylcarbodiimide (1.77 g, 10 mmol, 100 mol %). The mixture was allowed to stir at 0 °C for 5 minutes, at which point the reaction vessel was allowed to warm to room temperature. After 3 hours, the reaction mixture was filtered with the aid of dichloromethane (50 mL) and the filtrate was concentrated *in vacuo*. The oily residue was purified by flash column chromatography (SiO<sub>2</sub>: neat dichloromethane) to furnish the thioester (1.27 g, 5.1 mmol) as colorless crystals in 51% yield.

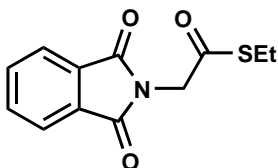

**<sup>1</sup>H NMR** (400 MHz, CDCl<sub>3</sub>): δ 7.92-7.89 (m, 2H), 7.79-7.75 (m, 2H), 4.49 (s, 2H), 2.94 (q, *J* = 7.56 Hz, 2H), 1.26 (t, *J* = 7.56 Hz, 3H).

**<sup>13</sup>C NMR** (100 MHz, CDCl<sub>3</sub>): δ 193.8, 167.3, 134.3, 131.8, 123.6, 46.5, 23.3, 14.4.

**HRMS (CI):** Calcd. for C<sub>12</sub>H<sub>12</sub>NO<sub>3</sub>S [*M*+1]: 250.0534, Found: 250.0538.

**FTIR (neat):** 3031, 2974, 2360, 1776, 1708, 1609, 1311, 1198, 1085, 927, 715 cm<sup>-1</sup>.

**M.P.:** 117 – 119 °C (crystals from dichloromethane: hexanes).

**R<sub>f</sub>:** 0.34 ethyl acetate: hexanes, 1:3.

---

<sup>3</sup> Neises, B.; Steglich, W. *Angew. Chem. Int. Ed.* **1978**, *17*, 522.



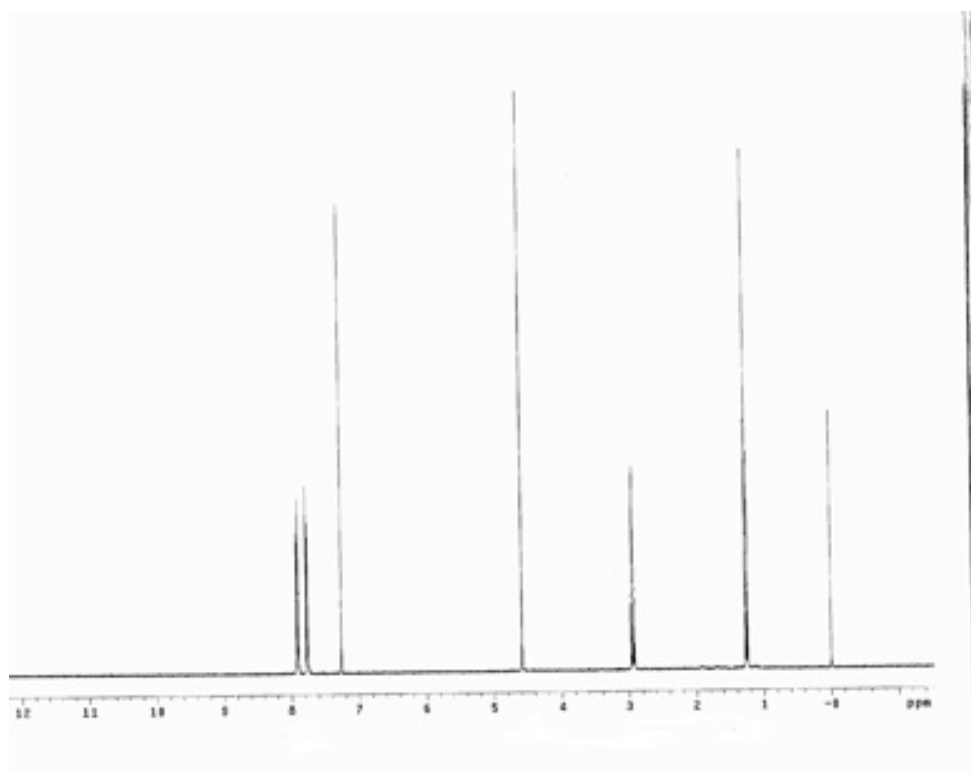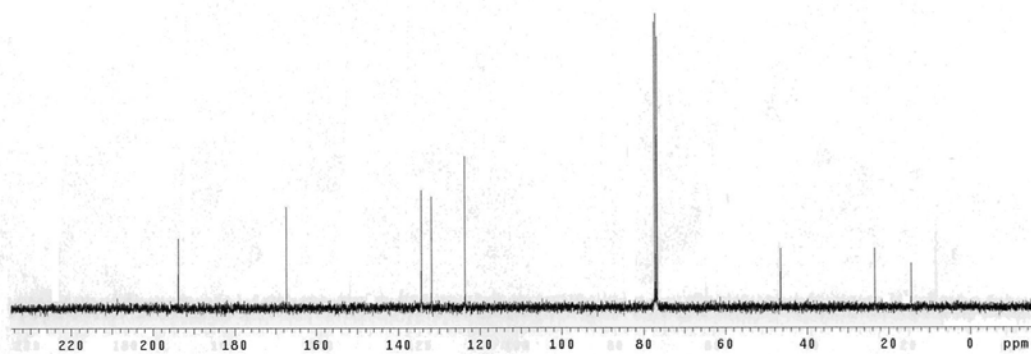

**Procedure for the preparation of 2-(1,3-dioxoisindolin-2-yl)-deuterio-acetaldehyde (deuterio-14a).** In accordance with Fukuyama's protocol,<sup>4</sup> to a 10 mL round bottomed flask equipped with stir bar and charged with thioester (150 mg, 0.6 mmol, 100 mol%) was added acetone (1.2 mL, 0.5 M) followed by Pd/C (3.2 mg, 10% wt. on carbon, 0.03 mmol, 5 mol%) and *deuterio*-triethylsilane (0.25 mL, 1.5 mmol, 250 mol%). The reaction mixture was allowed to stir for 12 hours at room temperature under an argon atmosphere, at which point the reaction mixture was filtered through celite with the aid of acetone (100 mL). The filtrate was concentrated *in vacuo* and the oily residue was purified by column chromatography (SiO<sub>2</sub>: ethyl acetate: hexanes, 25:75) to furnish *deuterio*-14b (89 mg, 0.48 mmol) as ivory crystals in 79% yield.

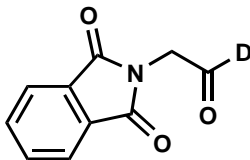

**<sup>1</sup>H NMR** (400 MHz, CDCl<sub>3</sub>): δ 7.90 (dd, *J* = 5.47 Hz, 2H), 7.77 (dd, *J* = 5.47 Hz, 2H), 4.57 (s, 2H).

**<sup>13</sup>C NMR** (100 MHz, CDCl<sub>3</sub>): δ 193.2 (t, *J*<sub>D-C</sub> = 27.9 Hz) 167.5, 134.3, 131.9, 123.6, 47.2.

**HRMS (CI):** Calcd. for C<sub>10</sub>NO<sub>3</sub>H<sub>7</sub>D [M+1]: 191.0567, Found: 191.0571.

**FTIR (neat):** 3174, 2823, 1774, 1703, 1405, 714 cm<sup>-1</sup>.

**M.P.:** 108 – 110 °C (crystals from ethyl acetate: hexanes).

**R<sub>f</sub>:** 0.2 ethyl acetate: hexanes, 1:1.

<sup>4</sup> (a) Tokuyama, H.; Fukuyama, T. *Aldrichimica Acta* **2004**, *37*, 87. (b) Fukuyama, T.; Lin, S. C.; Li, L. *J. Am. Chem. Soc.* **1990**, *112*, 7050.

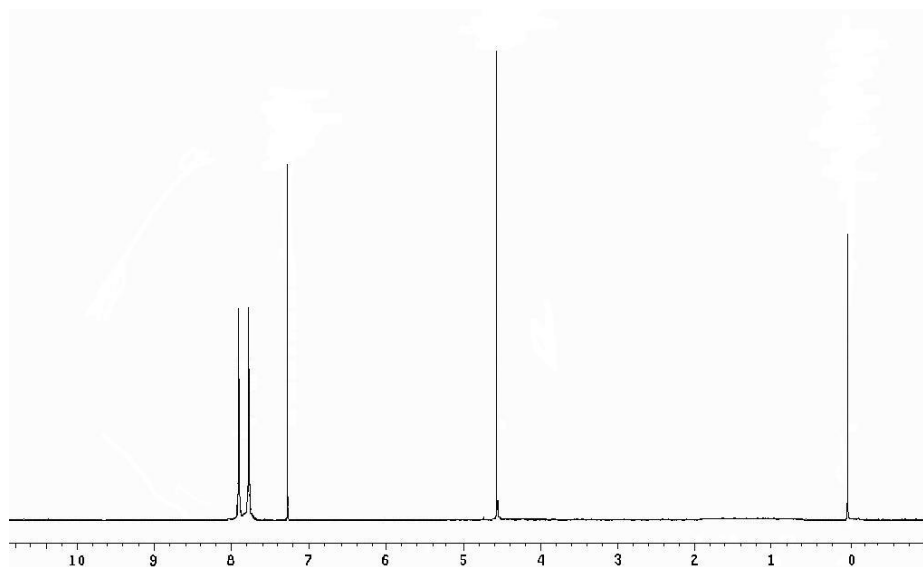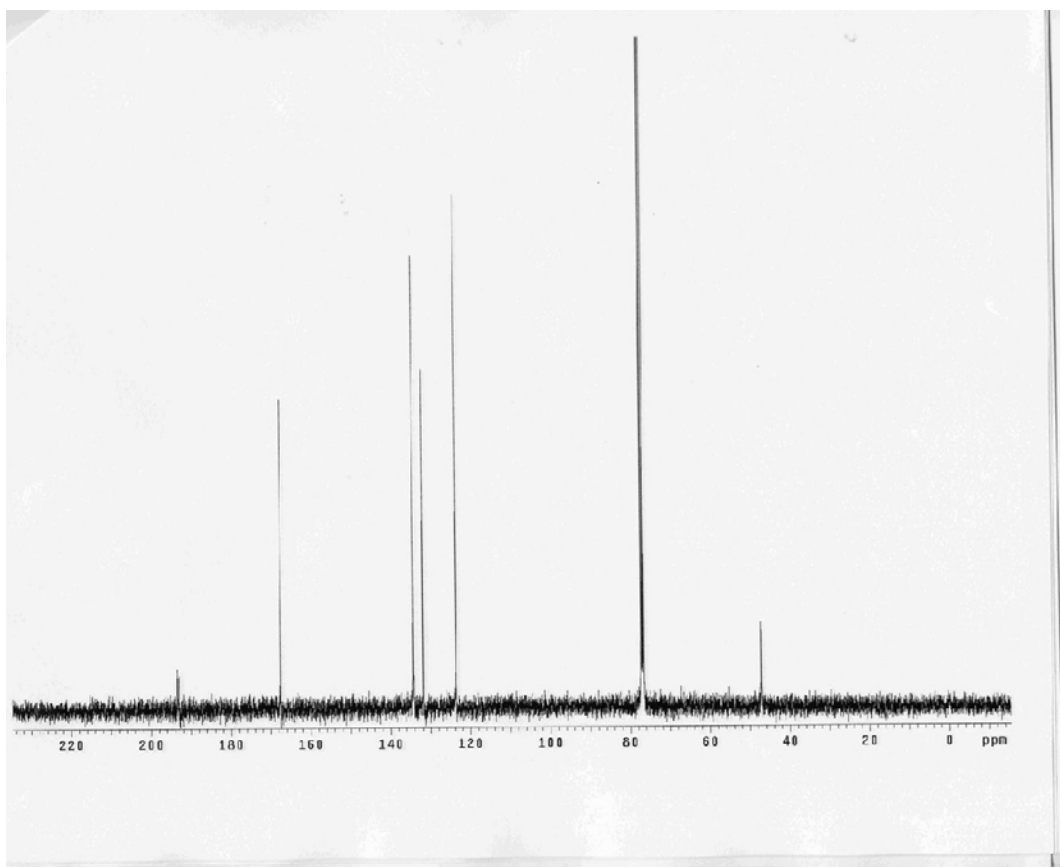

**(Z)-2-(2-oxohexa-3,5-dienyl-6-deuterio)isoindoline-1,3-dione (deuterio-14b).** The title compound was prepared from *deuterio-6a* in analogy to the procedure described for the conversion of **14a** to **14b**.

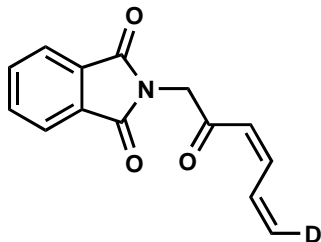

**<sup>1</sup>H NMR** (400 MHz, CDCl<sub>3</sub>): δ 7.91-7.87 (m, 2H), 7.77-7.72 (m, 2H), 7.64-7.50 (m, 1H), 6.58 (t, *J* = 11.18 Hz, 1H), 6.11 (d, *J* = 11.18 Hz, 1H), 5.60 (d, *J* = 9.8 Hz, 1H), 4.76 (s, 2H).

**<sup>13</sup>C NMR** (100 MHz, CDCl<sub>3</sub>): δ 191.5, 167.7, 145.6, 134.1, 132.9, 128.9, 128.1, 123.5, 120.6, 47.5.

**HRMS (CI):** Calcd. for C<sub>14</sub>H<sub>11</sub>DNO<sub>3</sub> [M+1]: 242.0817, Found: 242.0821.

**FTIR (neat):** 2923, 2847, 1746, 1712, 1692, 1409, 1388, 1303, 1090, 943, 711 cm<sup>-1</sup>.

**M.P.:** 102-104 °C (crystals from ethyl acetate: hexanes).

**R<sub>f</sub>:** 0.46 ethyl acetate: hexanes, 1:1.

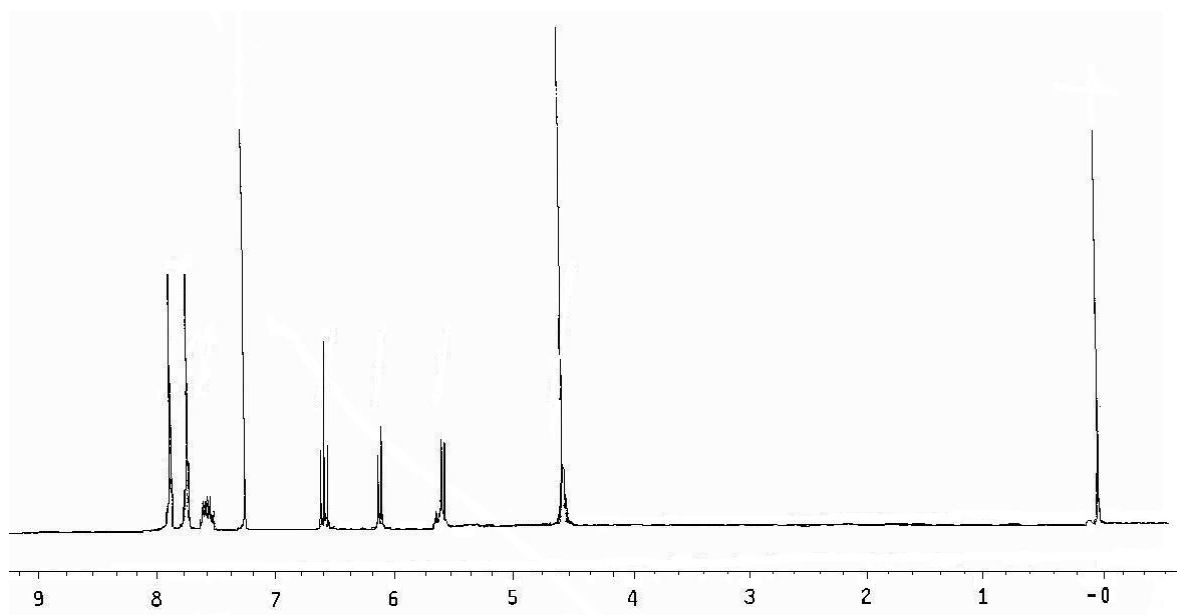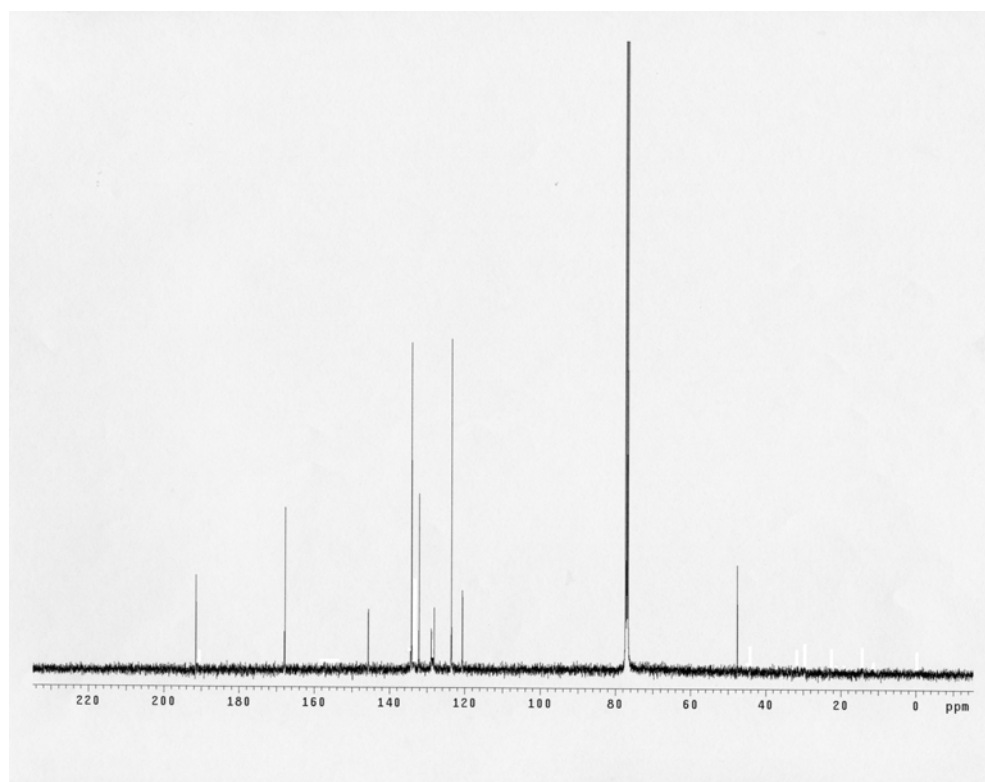

**Conversion of 15a to 15b and iso-15b.** To an oven dried test tube (18 x 150 mm) equipped with stir bar and charged with MgSO<sub>4</sub> (48mg, 0.4 mmol, 200 mol %), triphenyl acetic acid (2.88 mg, 0.01 mmol, 5 mol %), BIPHEP (5.23 mg, 0.01 mmol, 5 mol%) and Rh(COD)<sub>2</sub>SbF<sub>6</sub> (5.55 mg, 0.01 mmol, 5 mol%) was added 1,2-dichloroethane (0.4 mL). The resulting solution was sparged with argon for 1 minute, at which point substrate **15a** (54 mg, 0.2 mmol, 100 mol%) was added as a solution in dichloromethane (0.27 mL, 0.3 M overall concentration with respect to **15a**) *via* syringe. A gas bag filled with approximately equal volumes of C<sub>2</sub>H<sub>2</sub> and H<sub>2</sub> was attached to the reaction vessel using a cannula. The reaction vessel was sparged with the C<sub>2</sub>H<sub>2</sub>/H<sub>2</sub> mixture and the reaction mixture was allowed to stir at 45 °C for 24 hours, at which point the reaction mixture was deposited directly onto a silica gel column. Purification by column chromatography (SiO<sub>2</sub>: ethyl acetate: hexanes, 20:80) followed by recrystallization from dichloromethane: hexanes provides compound **15b** and *iso-15b* (50 mg, 0.15 mmol) as a colorless crystalline solid in 75% yield as a 4:1 mixture of alkene isomers. Spectroscopic data corresponds to the major isomer. See S3 for apparatus setup.

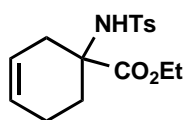

**<sup>1</sup>H NMR** (400MHz, CDCl<sub>3</sub>): δ 7.75 (d, *J* = 8.55 Hz, 2H), 7.27 (d, *J* = 8.55 Hz, 2H), 5.65 – 5.59 (m, 1H), 5.41 – 5.38 (m, 1H), 5.06 (s, 1H), 4.05 – 3.98 (m, 2H), 2.59 (dt, *J* = 17.78, 5.13 Hz, 1H), 2.24 (s, 3H), 2.8 (dt, *J* = 17.78, 4.1 Hz, 1H), 2.11 – 1.88 (m, 4H), 1.21 (t, *J* = 7.18 Hz, 3H).

**<sup>13</sup>C NMR** (100MHz, CDCl<sub>3</sub>): δ 172.1, 142.2, 139.9, 129.2, 126.2, 125.5, 122.9, 60.4, 58.9, 32.7, 29.6, 21.4, 20.9, 13.7.

**HRMS (CI):** Calcd. for C<sub>16</sub>H<sub>22</sub>NO<sub>4</sub>S 324.1270 [M+1], Found: 324.1264.

**FTIR (neat):** 3273, 2996, 2924, 2778, 1732, 1447, 1320, 1247, 1155, 1041, 818, 666 cm<sup>-1</sup>.

**MP:** 104 – 107 °C (crystals from dichloromethane: hexanes).

**R<sub>f</sub>:** 0.25 in neat dichloromethane.

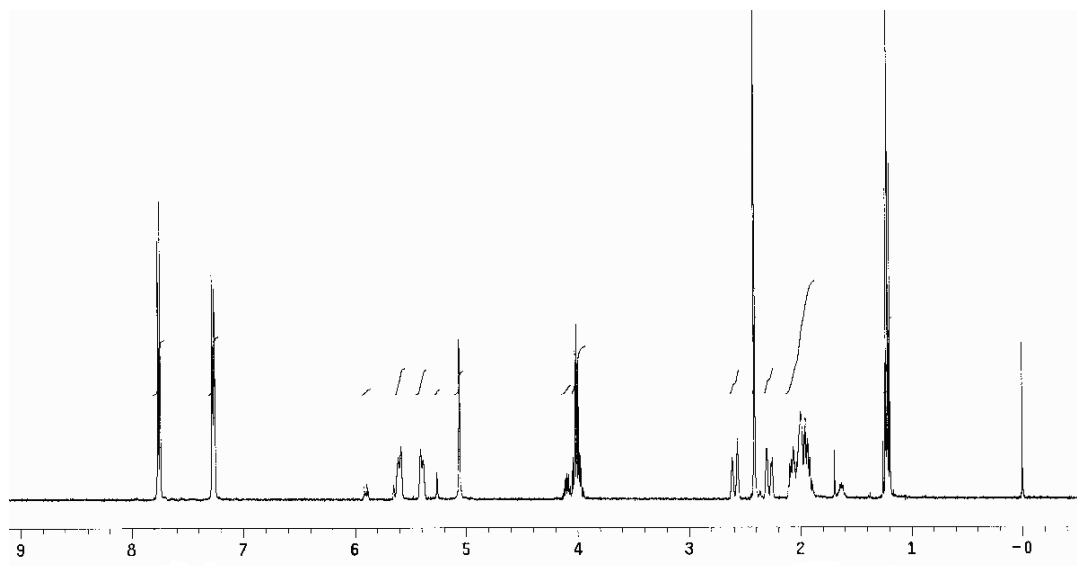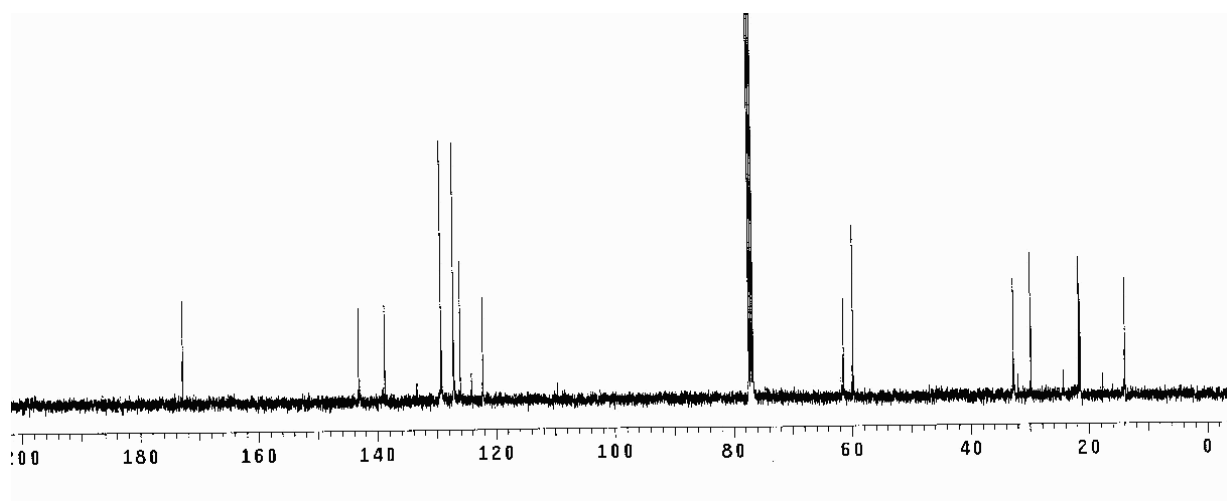

**deuterio-15b.** The title compound was prepared from **15a** in analogy to the procedure described for the conversion of **15a** to **15b** but using deuterium gas.

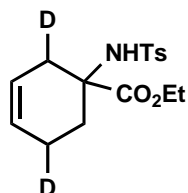

**<sup>1</sup>H NMR** (400MHz, CDCl<sub>3</sub>): δ 7.75 (d, *J* = 8.55 Hz, 2H), 7.27 (d, *J* = 8.55 Hz, 2H), 5.65 – 5.59 (m, 1H), 5.41 – 5.38 (m, 1H), 5.06 (s, 1H), 4.05 – 3.98 (m, 2H), 2.59 (dt, *J* = 17.78, 5.13 Hz, 0.6H), 2.24 (s, 3H), 2.8 (dt, *J* = 17.78, 4.1 Hz, 0.4H), 2.11 – 1.88 (m, 3H), 1.21 (t, *J* = 7.18 Hz, 3H).

**<sup>13</sup>C NMR** (100MHz, CDCl<sub>3</sub>): δ 172.9, 143.2, 138.7, 129.3, 127.2, 126.1, 122.2, 61.4, 59.7, 32.8 (t, *J* = 28.7 Hz), 29.7, 22.8 (t, *J* = 27.2 Hz) 21.5, 13.9.

**HRMS (CI):** Calcd. for C<sub>16</sub>H<sub>19</sub>D<sub>2</sub>NO<sub>4</sub>S 326.1360 [M+1], Found: 326.1364.

**FTIR (neat):** 3278, 2997, 2921, 2774, 1732, 1449, 1326, 1244, 1159, 1043, 821, 671 cm<sup>-1</sup>.

**MP:** 102-103 °C (crystals from dichloromethane: hexanes).

**R<sub>f</sub>:** 0.25 in neat dichloromethane.



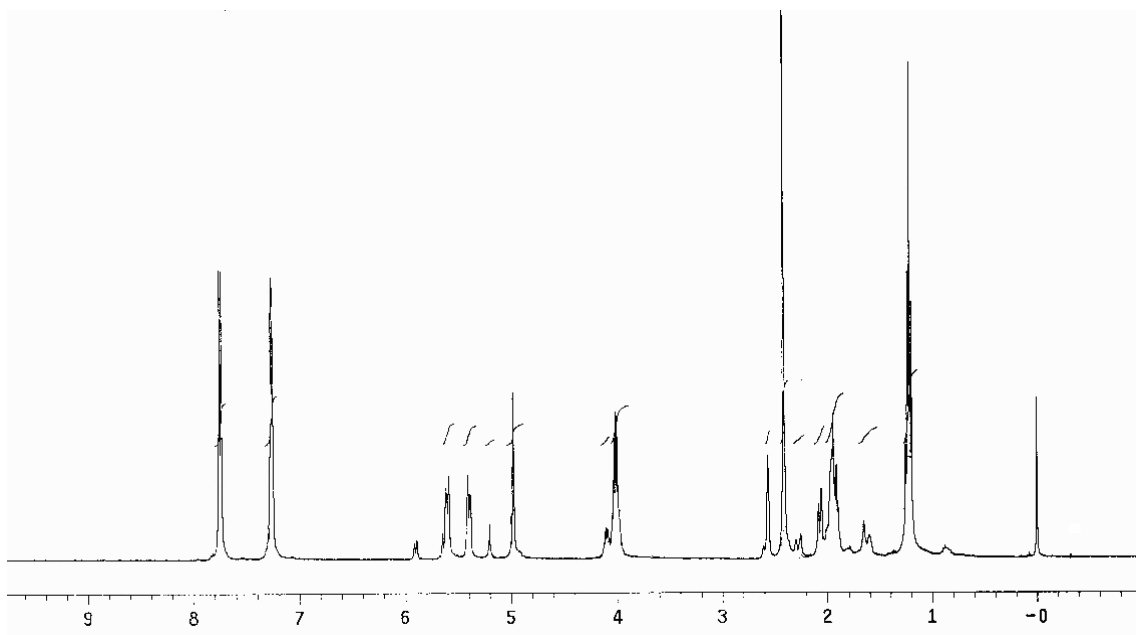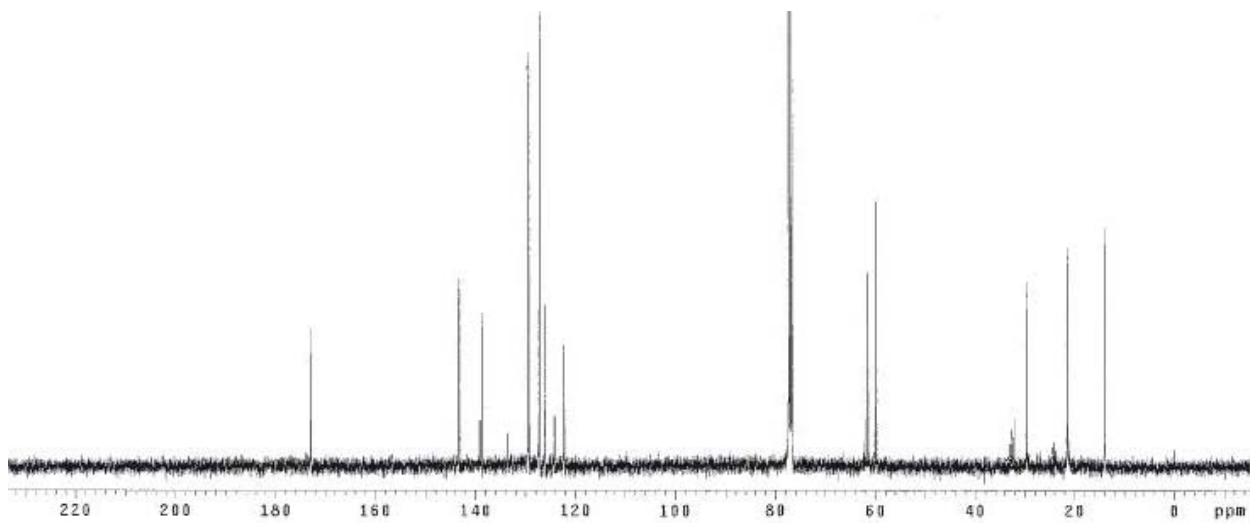

**Hydrogenation of 15b and iso-15b.** To an oven dried 10 mL round-bottomed flask equipped with stir bar and charged with **15b** (65 mg, 0.2 mmol, 100 mol%) and Pd/C ( 21 mg, 10% wt. on carbon, 0.02 mmol, 10 mol%) was added ethyl acetate (3.5 mL, 0.06 M). The reaction vessel was placed under an atmosphere of H<sub>2</sub> (1 atm) and was allowed to stir at room temperature for 24 hours. The solution was filtered through celite with the aid of ethyl acetate (15 mL). The filtrate was concentrated *in vacuo* to furnish a solid, which upon recrystallization (dichloromethane: hexanes) provides ethyl 1-(4-ethylphenylsulfonamido) cyclohexanecarboxylate (60 mg, 0.18 mmol) as colorless crystals in 92% yield.

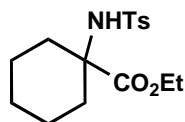

**<sup>1</sup>H NMR** (400MHz, CDCl<sub>3</sub>): δ 7.76 (d, *J* = 7.86 Hz, 2H), 7.28 (d, *J* = 7.52 Hz, 2H), 5.06 (s, 1H), 3.97 (q, *J* = 7.18 Hz, 2H), 2.42 (s, 3H), 1.84-1.81 (m, 4H), 1.41 – 1.38 (m, 6H), 1.22 (t, *J* = 7.18 Hz, 3H).

**<sup>13</sup>C NMR** (400MHz, CDCl<sub>3</sub>): δ 173.9, 143.2, 138.6, 129.3, 127.6, 61.4, 61.2, 33.1, 24.9, 21.5, 21.0, 13.9.

**HRMS (CI):** Calcd. for C<sub>16</sub>H<sub>23</sub>NO<sub>4</sub>S 326.1348 [M+1], Found: 326.1351.

**FTIR (neat):** 3285, 2953, 1733, 1321, 1234, 1092, 1054, 819, 666 cm<sup>-1</sup>.

**MP:** 106-107 °C (crystals from dichloromethane: hexanes).

**R<sub>f</sub>:** 0.3 in neat dichloromethane.

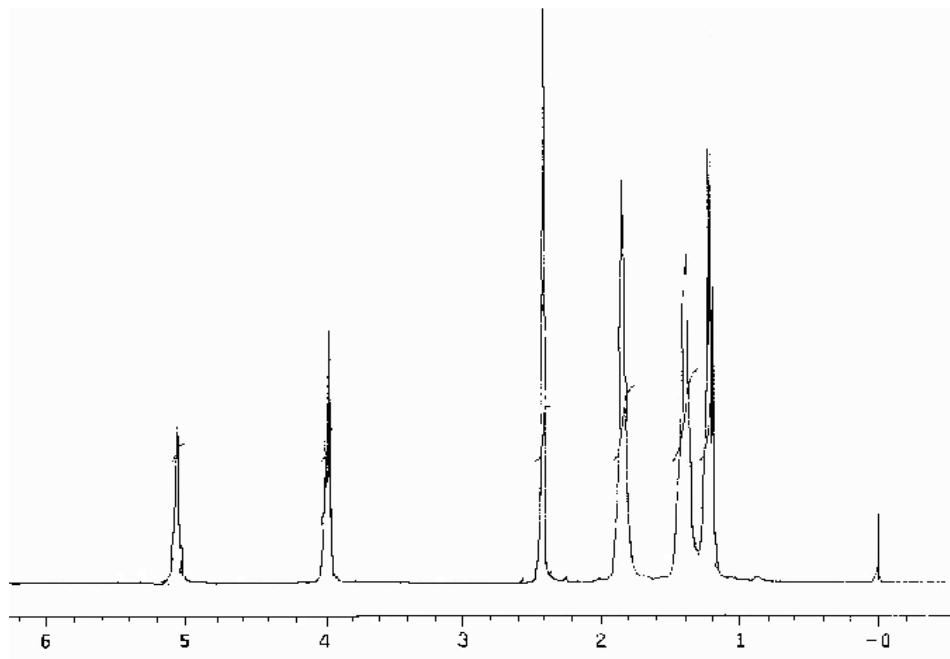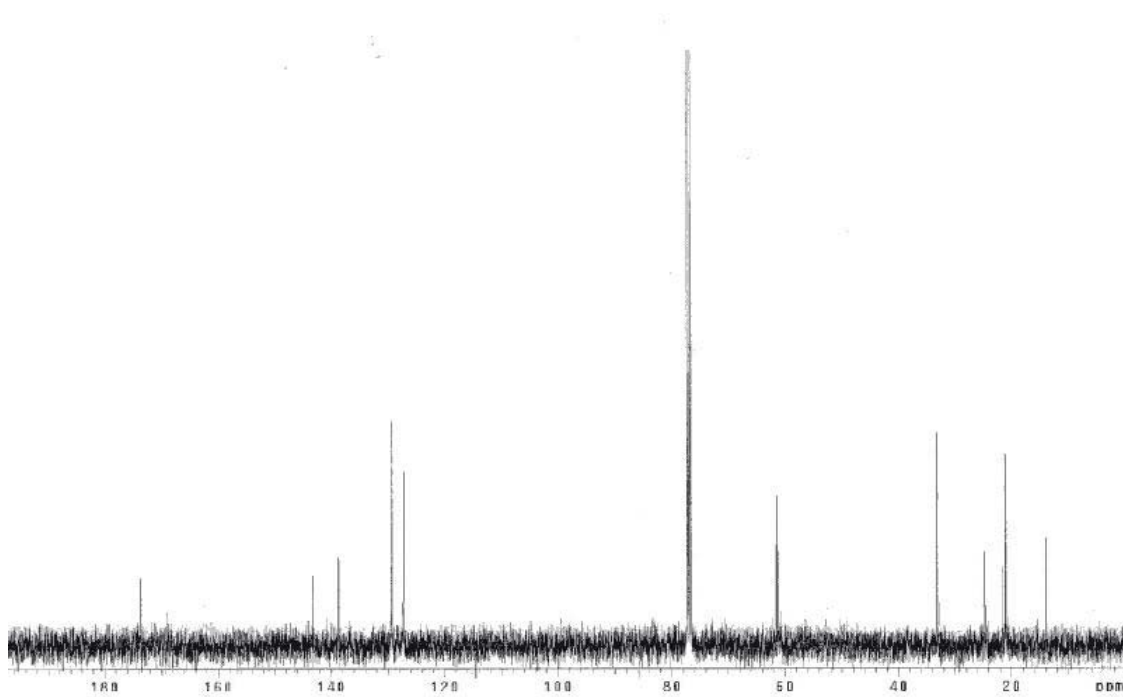

## DFT Data

*Table S1. Computational details*

All calculations were carried out using Density Functional Theory<sup>1</sup> as implemented in the Jaguar 7.0<sup>2</sup> suite of *ab initio* quantum chemistry programs. Geometries were optimized by using the B3LYP<sup>3, 4</sup> functional with the 6-31G\*\* basis set. Rhodium was represented by the Los Alamos LACVP basis,<sup>5, 6</sup> which includes relativistic effective core potentials. The energies were reevaluated by additional single point calculations at each optimized geometry using Dunning's correlation consistent triple- $\zeta$  basis set cc-pVTZ(-f)<sup>7</sup> with the standard double set of polarization functions. In these single-point calculations, Rh was described by a modified version of LACVP, designated as LACV3P, where the exponents were decontracted to match the effective core potential with the triple- $\zeta$  quality basis. Vibrational frequency calculation results based on analytical second derivatives at the B3LYP/6-31G\*\*/LACVP level of theory were used to confirm proper convergence to local minima and maxima for equilibrium and transition state geometries, respectively, and to derive the zero-point-energy (ZPE) and vibrational entropy corrections at room temperature. Unscaled vibrational frequencies are used for these corrections. Solvation energies were evaluated by a self-consistent reaction field (SCRf)<sup>8-10</sup> approach, based on accurate numerical solutions of the Poisson-Boltzmann equation.<sup>8, 11</sup> In the results reported below, solvation calculations were carried out at the gas-phase geometry using the 6-31G\*\*/LACVP basis and employing a dielectric constant of  $\epsilon = 10.3$  for DCE.

## References

1. Parr, R. G.; Yang, W., *Density Functional Theory of Atoms and Molecules*. Oxford University Press: New York, 1989.
2. Jaguar 7.0, Schrödinger, Inc., Portland, Oregon, 2003.
3. Becke, A. D., *J. Chem. Phys.* **1993**, *98*, 5648-5652.
4. Lee, C. T.; Yang, W. T.; Parr, R. G., *Phys. Rev. B* **1988**, *37*, 785-789.
5. Hay, P. J.; Wadt, W. R., *J. Chem. Phys.* **1985**, *82*, 270-283.
6. Hay, P. J.; Wadt, W. R., *J. Chem. Phys.* **1985**, *82*, 299-310.
7. Dunning, T. H., *J. Chem. Phys.* **1989**, *90*, 1007-1023.
8. Marten, B.; Kim, K.; Cortis, C.; Friesner, R. A.; Murphy, R. B.; Ringnalda, M. N.; Sitkoff, D.; Honig, B., *J. Phys. Chem.* **1996**, *100*, 11775-11788.
9. Friedrichs, M.; Zhou, R. H.; Edinger, S. R.; Friesner, R. A., *J. Phys. Chem. B* **1999**, *103*, 3057-3061.
10. Edinger, S. R.; Cortis, C.; Shenkin, P. S.; Friesner, R. A., *J. Phys. Chem. B* **1997**, *101*, 1190-1197.
11. Tannor, D. J.; Marten, B.; Murphy, R. B.; Friesner, R. A.; Sitkoff, D.; Nicholls, A.; Ringnalda, M. N.; Goddard, W. A., III; Honig, B., *J. Am. Chem. Soc.* **1994**, *116*, 11875-11882.

**Table S2.** Optimized structures of all intermediates and transition states for Cycle A, defined according to Figure 2 in the main text.

**3 - Rh(I)BIPHEP bis-acetylene complex**

|    |              |               |              |
|----|--------------|---------------|--------------|
| Rh | 0.477709699  | -0.013730415  | -0.339451285 |
| P  | -0.355312036 | 0.247597931   | 1.845916852  |
| C  | -1.764970671 | 1.443970079   | 1.985914131  |
| C  | -1.556691808 | 2.704627459   | 2.568650964  |
| H  | -0.585464291 | 2.959813293   | 2.972160112  |
| C  | -2.582001222 | 3.643674923   | 2.668112130  |
| H  | -2.384194772 | 4.607840224   | 3.127113405  |
| C  | -3.850551195 | 3.332938632   | 2.189306531  |
| H  | -4.660982714 | 4.052397173   | 2.259839762  |
| C  | -4.078452729 | 2.080413124   | 1.625576520  |
| H  | -5.068483811 | 1.829178062   | 1.257200155  |
| C  | -3.059906068 | 1.121245381   | 1.507456206  |
| C  | -3.037927538 | -0.762371168  | -0.266828299 |
| C  | -3.482267524 | -0.208970896  | 0.958568185  |
| C  | -4.477287833 | -0.886942260  | 1.681958851  |
| H  | -4.815894698 | -0.456254061  | 2.619467093  |
| C  | -5.031345485 | -2.084622408  | 1.234483710  |
| H  | -5.794463899 | -2.583857999  | 1.823891373  |
| C  | -4.606989352 | -2.617645850  | 0.020664798  |
| H  | -5.038559621 | -3.537383986  | -0.362429389 |
| C  | -3.625742373 | -1.956183917  | -0.718634205 |
| H  | -3.329850864 | -2.376393727  | -1.671200519 |
| P  | -1.709344011 | 0.061171236   | -1.266612019 |
| C  | 2.256981725  | -1.163180045  | 0.449527284  |
| C  | 2.700552685  | -0.021041483  | 0.346950161  |
| C  | 1.383338444  | 0.799249668   | -2.299905308 |
| C  | 1.448506846  | -0.410003273  | -2.485699625 |
| H  | 2.137273735  | -2.208685323  | 0.646064694  |
| H  | 3.291792960  | 0.868806706   | 0.329288729  |
| H  | 1.433769004  | 1.864726301   | -2.382088574 |
| H  | 1.573011790  | -1.420640402  | -2.806409781 |
| C  | -2.395815644 | 1.714578073   | -1.676964591 |
| C  | -1.584490238 | 2.854697986   | -1.598590505 |
| H  | -0.561255244 | 2.759474201   | -1.249326980 |
| C  | -2.090525933 | 4.111871412   | -1.934801911 |
| H  | -1.451384860 | 4.987086569   | -1.863701770 |
| C  | -3.414836744 | 4.243867003   | -2.353262634 |
| H  | -3.809612863 | 5.220917754   | -2.614967734 |
| C  | -4.234528629 | 3.114038854   | -2.427761377 |
| H  | -5.268216802 | 3.211137703   | -2.746541011 |
| C  | -3.732078406 | 1.858333576   | -2.089196450 |
| H  | -4.382210409 | 0.989475153   | -2.141885654 |
| C  | -1.701373596 | -0.875667905  | -2.854610272 |
| C  | -2.141130838 | -0.322350254  | -4.064680785 |
| H  | -2.526979835 | 0.690172936   | -4.096821991 |
| C  | -2.083068859 | -1.067310859  | -5.246276481 |
| H  | -2.425834836 | -0.620953964  | -6.175038029 |
| C  | -1.590949400 | -2.3711646009 | -5.237007659 |
| H  | -1.552038721 | -2.948550110  | -6.155815749 |
| C  | -1.144749058 | -2.930998312  | -4.035843677 |
| H  | -0.759320095 | -3.946344074  | -4.016762338 |
| C  | -1.191039271 | -2.186831221  | -2.858259224 |
| H  | -0.830766804 | -2.628805648  | -1.932245835 |
| C  | -0.946243709 | -1.246298430  | 2.734980149  |

|   |              |              |             |
|---|--------------|--------------|-------------|
| C | -1.612298839 | -1.129096094 | 3.968018294 |
| H | -1.805110520 | -0.147607396 | 4.391933002 |
| C | -2.036285135 | -2.268173386 | 4.650562634 |
| H | -2.548307479 | -2.164766627 | 5.602934566 |
| C | -1.808212337 | -3.537269844 | 4.110832987 |
| H | -2.142466059 | -4.422954041 | 4.642786879 |
| C | -1.156606286 | -3.661126276 | 2.883410410 |
| H | -0.986132698 | -4.644137678 | 2.454129556 |
| C | -0.727394910 | -2.522045689 | 2.199273568 |
| H | -0.240125066 | -2.620200322 | 1.233505718 |
| C | 0.963581314  | 0.966951493  | 2.919777779 |
| C | 1.650710400  | 2.110463456  | 2.470772594 |
| H | 1.393650832  | 2.552659155  | 1.511295163 |
| C | 2.654809416  | 2.689894698  | 3.244429561 |
| H | 3.164507689  | 3.580399376  | 2.887530473 |
| C | 3.005688124  | 2.126060047  | 4.474496073 |
| H | 3.790871441  | 2.573662974  | 5.076097685 |
| C | 2.344234633  | 0.982782885  | 4.919406230 |
| H | 2.613622029  | 0.532716747  | 5.870389619 |
| C | 1.329368071  | 0.405419035  | 4.150504045 |
| H | 0.829116818  | -0.483061875 | 4.518199688 |

**3-TS - Oxidative addition TS**

|    |              |              |              |
|----|--------------|--------------|--------------|
| Rh | 0.428403840  | -0.068145613 | -0.337784417 |
| P  | -0.404960498 | 0.206951384  | 1.807663829  |
| C  | -1.764015879 | 1.449684371  | 1.941629685  |
| C  | -1.495717322 | 2.713699845  | 2.487865116  |
| H  | -0.498235564 | 2.948700800  | 2.839793002  |
| C  | -2.495879816 | 3.677988562  | 2.607383175  |
| H  | -2.260112380 | 4.647310925  | 3.036356511  |
| C  | -3.789758840 | 3.385719424  | 2.186454324  |
| H  | -4.579836161 | 4.125168448  | 2.277195242  |
| C  | -4.071049575 | 2.131426774  | 1.649272909  |
| H  | -5.079286767 | 1.901722750  | 1.317958991  |
| C  | -3.079449373 | 1.149563350  | 1.507407880  |
| C  | -3.026403075 | -0.756507070 | -0.229774503 |
| C  | -3.516835611 | -0.176836970 | 0.966425362  |
| C  | -4.533604018 | -0.843547392 | 1.667052115  |
| H  | -4.910985168 | -0.396573908 | 2.581839958  |
| C  | -5.053523709 | -2.059701178 | 1.227533556  |
| H  | -5.836476248 | -2.552304771 | 1.795982589  |
| C  | -4.564130657 | -2.628383644 | 0.054873911  |
| H  | -4.961507139 | -3.571042342 | -0.309475590 |
| C  | -3.563208936 | -1.977215701 | -0.666392101 |
| H  | -3.209939252 | -2.422899041 | -1.588752547 |
| P  | -1.712439552 | 0.078863496  | -1.225787366 |
| C  | 2.640304027  | -0.761461134 | -0.238489204 |
| C  | 1.846459268  | -1.334805718 | 0.573043081  |
| C  | 1.034858051  | 0.902828796  | -2.109635392 |
| C  | 1.996866229  | 0.074087390  | -2.043229025 |
| H  | 3.669821839  | -0.504492456 | -0.417864072 |
| H  | 1.847757615  | -1.916754894 | 1.479309772  |
| H  | 0.534997026  | 1.557080943  | -2.803755918 |
| H  | 2.750164797  | -0.438773189 | -2.615648028 |
| C  | -2.445541630 | 1.716892220  | -1.621073685 |
| C  | -1.695362778 | 2.894278425  | -1.499022416 |
| H  | -0.676147553 | 2.846442210  | -1.129125193 |
| C  | -2.259801468 | 4.129005561  | -1.827193656 |
| H  | -1.668089839 | 5.034006264  | -1.724591651 |

|   |              |               |              |   |              |              |              |
|---|--------------|---------------|--------------|---|--------------|--------------|--------------|
| C | -3.577638876 | 4.201398582   | -2.278945376 | H | -5.767802895 | -2.532931964 | -0.179457238 |
| H | -4.014412724 | 5.161623395   | -2.536653427 | C | -4.027353578 | -1.334514903 | -0.565830041 |
| C | -4.337579939 | 3.033685135   | -2.390066588 | H | -3.847592778 | -1.821725639 | -1.515988210 |
| H | -5.367077460 | 3.083197390   | -2.732761543 | P | -1.842587239 | 0.227135435  | -1.304074806 |
| C | -3.780160083 | 1.799858967   | -2.058092433 | C | 0.520037082  | 2.205186683  | -0.335011087 |
| H | -4.386232604 | 0.901472366   | -2.135573145 | C | 1.421779599  | 2.616704509  | -1.241777803 |
| C | -1.637855507 | -0.845631427  | -2.814647864 | C | 1.766032514  | 1.658525804  | -2.308113116 |
| C | -2.165513982 | -0.347895358  | -4.014516905 | C | 1.082707714  | 0.496569410  | -2.277345531 |
| H | -2.669468221 | 0.611636869   | -4.038078235 | H | 0.037925539  | 2.789957379  | 0.442654646  |
| C | -2.040350864 | -1.082181452  | -5.196362281 | H | 1.840453112  | 3.623190194  | -1.217534612 |
| H | -2.451044673 | -0.683298729  | -6.119246053 | H | 2.498583389  | 1.914342340  | -3.073472051 |
| C | -1.393046645 | -2.316597951  | -5.194562306 | H | 1.158127815  | -0.290230467 | -3.027980677 |
| H | -1.299227525 | -2.884660682  | -6.115361328 | C | 1.180173460  | 0.208789500  | 3.064484981  |
| C | -0.859320298 | -2.818370449  | -4.004625822 | C | 2.280076943  | 0.930367081  | 2.567862525  |
| H | -0.349532655 | -3.777445817  | -3.995990914 | H | 2.239882811  | 1.374024784  | 1.575547368  |
| C | -0.972016564 | -2.085310838  | -2.825731134 | C | 3.421766452  | 1.106720351  | 3.351010251  |
| H | -0.535091457 | -2.472038386  | -1.909031921 | H | 4.263971445  | 1.666743911  | 2.954940640  |
| C | -1.043455432 | -1.233811960  | 2.748210326  | C | 3.482581408  | 0.560526469  | 4.634342471  |
| C | -1.675833809 | -1.034213030  | 3.988696589  | H | 4.372819904  | 0.693552230  | 5.241945256  |
| H | -1.809521447 | -0.0288660348 | 4.378028504  | C | 2.396204522  | -0.161853831 | 5.132904520  |
| C | -2.143089892 | -2.122262561  | 4.723053623  | H | 2.439049959  | -0.592477580 | 6.129122586  |
| H | -2.625775728 | -1.957226966  | 5.681972495  | C | 1.252357431  | -0.340020773 | 4.355045999  |
| C | -1.995643594 | -3.419288183  | 4.225093761  | H | 0.421263012  | -0.913385474 | 4.752609521  |
| H | -2.363250860 | -4.265776094  | 4.797765455  | C | -1.091764886 | -1.532746528 | 2.644080195  |
| C | -1.384531190 | -3.624050372  | 2.988488945  | C | -2.012810111 | -1.496300803 | 3.701316159  |
| H | -1.279910685 | -4.629673351  | 2.591849078  | H | -2.307172323 | -0.543989650 | 4.132987205  |
| C | -0.910616021 | -2.536998826  | 2.251724266  | C | -2.555103789 | -2.680300986 | 4.202243929  |
| H | -0.454771417 | -2.698309323  | 1.280116039  | H | -3.268155172 | -2.642131206 | 5.020922601  |
| C | 0.984060174  | 0.887294297   | 2.804378538  | C | -2.181130243 | -3.909775172 | 3.656926929  |
| C | 1.771789454  | 1.904622358   | 2.234904354  | H | -2.605013826 | -4.829715758 | 4.048955943  |
| H | 1.546860816  | 2.265753863   | 1.235035086  | C | -1.260990640 | -3.955554899 | 2.608083768  |
| C | 2.844204432  | 2.447807577   | 2.938603717  | H | -0.963539301 | -4.910822087 | 2.185189475  |
| H | 3.438263039  | 3.238486459   | 2.489637579  | C | -0.720557804 | -2.773215664 | 2.102584759  |
| C | 3.158224209  | 1.970891260   | 4.213852980  | H | 0.005561198  | -2.818871932 | 1.293492217  |
| H | 3.997776655  | 2.389971866   | 4.760487519  | C | -1.736650640 | -1.122614805 | -2.535750437 |
| C | 2.394380424  | 0.950957578   | 4.778774581  | C | -2.013015880 | -0.929496019 | -3.895303795 |
| H | 2.637880333  | 0.570144037   | 5.766250311  | H | -2.356432036 | 0.035447808  | -4.253150137 |
| C | 1.311470437  | 0.410209291   | 4.081679129  | C | -1.847054410 | -1.984046752 | -4.795820775 |
| H | 0.732474528  | -0.384673548  | 4.537721652  | H | -2.069364121 | -1.829976273 | -5.847645446 |

---

#### 4 - Rh-(III)-BIPHEP Rhodacyclopentadiene

---

|    |              |              |              |
|----|--------------|--------------|--------------|
| Rh | 0.235394163  | 0.223534048  | -0.435484490 |
| P  | -0.294392752 | -0.021347819 | 1.985875603  |
| C  | -1.418004149 | 1.399238290  | 2.326677717  |
| C  | -0.927114880 | 2.496170338  | 3.051013751  |
| H  | 0.040944809  | 2.425789597  | 3.535773805  |
| C  | -1.655020694 | 3.682000174  | 3.156713488  |
| H  | -1.251281818 | 4.513483393  | 3.726889421  |
| C  | -2.891925563 | 3.789942315  | 2.527989357  |
| H  | -3.465727531 | 4.709787192  | 2.590937417  |
| C  | -3.404504835 | 2.698226826  | 1.828679522  |
| H  | -4.384145348 | 2.771160300  | 1.365182676  |
| C  | -2.693124607 | 1.493942128  | 1.711295461  |
| C  | -3.169639722 | -0.303304906 | -0.135348071 |
| C  | -3.437810089 | 0.339604959  | 1.099571073  |
| C  | -4.562344699 | -0.079801567 | 1.832766845  |
| H  | -4.772241843 | 0.416088141  | 2.775418584  |
| C  | -5.400069202 | -1.102847820 | 1.396277263  |
| H  | -6.256809043 | -1.395814900 | 1.995482769  |
| C  | -5.127747544 | -1.736377436 | 0.187464131  |

---

#### 5 - Rhodacyclopentadiene, aldehyde adduct

---

|    |              |             |              |
|----|--------------|-------------|--------------|
| Rh | 0.338371100  | 0.119919603 | -0.114528988 |
| P  | -0.754789443 | 0.086497521 | 2.147905717  |

C -2.045275571 1.406615030 2.148662209  
 C -1.831301489 2.597749227 2.859195553  
 H -0.970851631 2.683360277 3.513253251  
 C -2.706764746 3.679232231 2.750247358  
 H -2.512528476 4.587072820 3.313951235  
 C -3.823153660 3.583903227 1.924735883  
 H -4.511488144 4.417810679 1.826192389  
 C -4.062887191 2.396160705 1.234216298  
 H -4.948783067 2.309213635 0.612279727  
 C -3.191618359 1.299057057 1.319743502  
 C -3.047024678 -0.594795270 -0.473867556  
 C -3.638784050 0.025560725 0.656419733  
 C -4.802555306 -0.547963251 1.196656216  
 H -5.261997533 -0.062946173 2.052056121  
 C -5.370825963 -1.710055799 0.679613082  
 H -6.268400019 -2.121849243 1.130968986  
 C -4.778955304 -2.326149048 -0.418848909  
 H -5.204640989 -3.228838501 -0.846037627  
 C -3.637294061 -1.764186327 -0.988858961  
 H -3.210866728 -2.239696958 -1.862852714  
 P -1.588808775 0.116143147 -1.371348496  
 C 0.514741707 2.119145940 -0.099714629  
 C 1.415362465 2.601319818 -0.975097345  
 C 1.955813540 1.638813260 -1.939302323  
 C 1.461221681 0.389298282 -1.828922992  
 H -0.080531280 2.696397096 0.603195149  
 H 1.679777905 3.659250434 -0.996655441  
 H 2.668263805 1.946414732 -2.705127859  
 H 1.720752175 -0.427486727 -2.502697886  
 C 4.048904251 0.717286393 0.934155050  
 C 3.340140741 -0.588768599 1.021066859  
 H 4.891699388 0.615092053 0.238165523  
 H 3.386169808 1.518682078 0.610507120  
 H 4.485359121 0.945362643 1.915088360  
 H 3.943296989 -1.461758773 1.328219471  
 O 2.150740210 -0.783107464 0.787916897  
 C -2.246720273 1.594383362 -2.228535948  
 C -1.366099148 2.442109636 -2.920128936  
 H -0.304795257 2.230715756 -2.918554978  
 C -1.856580250 3.539954230 -3.624836505  
 H -1.165776618 4.186717617 -4.157929377  
 C -3.226668666 3.806596164 -3.647526232  
 H -3.605564164 4.665567310 -4.193831232  
 C -4.108211339 2.962380594 -2.972176160  
 H -5.176549097 3.157009455 -2.995265534  
 C -3.624823311 1.859349050 -2.268230891  
 H -4.323958282 1.204585117 -1.760234012  
 C -1.230185411 -1.112579589 -2.693812266  
 C -1.491587594 -0.863586667 -4.047094368  
 H -1.950184368 0.070642144 -4.352308601  
 C -1.161046620 -1.817882723 -5.013196247  
 H -1.370156031 -1.612844873 -6.059079239  
 C -0.569049889 -3.025033743 -4.641686168  
 H -0.315601957 -3.763937371 -5.395898491  
 C -0.306308591 -3.281822985 -3.292551279  
 H 0.150277215 -4.221146302 -2.994160020  
 C -0.631850918 -2.331979784 -2.326554338  
 H -0.436689809 -2.550617885 -1.278185095  
 C 0.437908921 0.541904522 3.487439159  
 C 1.403640972 1.536877537 3.245957726  
 H 1.426553061 2.051080940 2.290330702  
 C 2.334713879 1.881259147 4.226252436

H 3.061508042 2.663817359 4.024586948  
 C 2.334801605 1.225377095 5.459516948  
 H 3.062859037 1.489676895 6.220770907  
 C 1.390011154 0.229191809 5.705199660  
 H 1.380304452 -0.289577467 6.659531928  
 C 0.448305812 -0.110095904 4.730919697  
 H -0.276225673 -0.887127244 4.946685243  
 C -1.559892271 -1.435076821 2.784833140  
 C -2.593447525 -1.394016564 3.734061512  
 H -2.972496900 -0.437105352 4.081874533  
 C -3.136566883 -2.576701901 4.235737219  
 H -3.934320584 -2.532442392 4.971789096  
 C -2.656275554 -3.813301864 3.730918418  
 H -3.081252467 -4.732358080 4.189273149  
 C -1.630586536 -3.863082058 2.851671204  
 H -1.253271604 -4.821626901 2.507021169  
 C -1.086040567 -2.680855732 2.346656151  
 H -0.279573823 -2.727911476 1.618505697

=====

**5-TS - Aldehyde insertion TS**

=====

C -1.615075132 3.350741157 1.197628627  
 C -2.509166955 3.154592590 2.261948507  
 H -2.174293870 3.379065710 3.270504150  
 C -3.810423832 2.697306310 2.057805363  
 H -4.471722414 2.548515610 2.906162244  
 C -4.255130386 2.456274552 0.761914492  
 H -5.272532701 2.123460272 0.579058740  
 C -3.384844619 2.644274589 -0.312146377  
 H -3.741585242 2.450441832 -1.317445399  
 C -2.062880057 3.076038426 -0.119772797  
 P -0.903384670 3.029756932 -1.551191565  
 C -0.315607375 4.022999962 1.540296432  
 C -0.457199568 5.321608810 2.063212268  
 H -1.456797993 5.739577916 2.134061560  
 C 0.632615553 6.079601363 2.478457614  
 H 0.478443645 7.080470161 2.870782035  
 C 1.912849000 5.541483038 2.388167738  
 H 2.778860315 6.111770519 2.709994539  
 C 2.080170062 4.253694589 1.887881377  
 H 3.081464711 3.842570220 1.844144705  
 C 0.988196318 3.476298562 1.456208327  
 P 1.367004142 1.748169084 0.919009597  
 Rh 0.586718756 1.095216015 -1.178904374  
 C -0.810852093 -0.055174438 -0.422555220  
 C -0.515894035 -1.382020876 -0.304967177  
 H -1.776429686 0.374211734 -0.161406122  
 H -1.256878162 -2.103637249 0.035420599  
 C 0.824536836 -1.755436906 -0.641025325  
 C 1.608097832 -0.762789472 -1.186493135  
 H 1.190069881 -2.765133127 -0.446254469  
 H 2.684274004 -0.886756566 -1.296417545  
 O 0.756590547 0.718843144 -3.191765939  
 C 1.073902056 -0.538195401 -3.197735293  
 C 2.304086613 -0.971958039 -3.949741940  
 H 0.246595262 -1.256111118 -3.162961369  
 H 2.565536886 -2.008237032 -3.722529534  
 H 2.085882389 -0.900730130 -5.024096184  
 H 3.150363209 -0.314784747 -3.734856754  
 C -1.966492116 2.792465720 -3.034929652  
 C -2.465793078 3.886485338 -3.760351784

|    |              |              |              |
|----|--------------|--------------|--------------|
| H  | -2.220317617 | 4.899766378  | -3.461271246 |
| C  | -3.275798433 | 3.681817358  | -4.877191211 |
| H  | -3.652829794 | 4.537155620  | -5.430248915 |
| C  | -3.597999121 | 2.386489955  | -5.283875003 |
| H  | -4.226304962 | 2.229577132  | -6.155870964 |
| C  | -3.107127357 | 1.292732216  | -4.569105311 |
| H  | -3.352254341 | 0.282059280  | -4.882842529 |
| C  | -2.292137751 | 1.491792552  | -3.455358341 |
| H  | -1.908600712 | 0.634037538  | -2.914011135 |
| C  | -0.222223545 | 4.715762586  | -1.796540156 |
| C  | 0.923814802  | 4.854878867  | -2.597205314 |
| H  | 1.401297027  | 3.974019055  | -3.021016004 |
| C  | 1.434890157  | 6.120679621  | -2.886158562 |
| H  | 2.317186804  | 6.215783742  | -3.512492948 |
| C  | 0.809973798  | 7.261999874  | -2.378646216 |
| H  | 1.207312590  | 8.247121888  | -2.604068467 |
| C  | -0.333004584 | 7.131685525  | -1.587559556 |
| H  | -0.829154445 | 8.015968111  | -1.197660534 |
| C  | -0.849968101 | 5.867141133  | -1.299298625 |
| H  | -1.746587776 | 5.778450188  | -0.693496589 |
| C  | 3.159584645  | 1.810230913  | 0.503452937  |
| C  | 3.518163161  | 2.530074833  | -0.652919965 |
| H  | 2.765552551  | 3.090437339  | -1.203472579 |
| C  | 4.844970008  | 2.573023575  | -1.077962540 |
| H  | 5.107718675  | 3.138026210  | -1.967664965 |
| C  | 5.833920534  | 1.902869077  | -0.352930754 |
| H  | 6.868661303  | 1.939137623  | -0.679811771 |
| C  | 5.487110357  | 1.198976658  | 0.801309927  |
| H  | 6.253557082  | 0.688487411  | 1.377097102  |
| C  | 4.157943181  | 1.148665451  | 1.230623096  |
| H  | 3.907622849  | 0.601769477  | 2.133208453  |
| C  | 1.181959813  | 0.734638027  | 2.437506641  |
| C  | 0.642483394  | 1.283970812  | 3.611272085  |
| H  | 0.341916221  | 2.324924576  | 3.640546036  |
| C  | 0.500802053  | 0.500165087  | 4.757373532  |
| H  | 0.083890838  | 0.941402179  | 5.657883671  |
| C  | 0.898608309  | -0.836532165 | 4.751344047  |
| H  | 0.790704487  | -1.442834114 | 5.645582139  |
| C  | 1.443336615  | -1.388938558 | 3.589887231  |
| H  | 1.763651364  | -2.426704607 | 3.577985124  |
| C  | 1.581022791  | -0.614060062 | 2.439577411  |
| H  | 2.007065027  | -1.055352524 | 1.546902193  |
| C  | 0.836072562  | 6.440289037  | 0.436564657  |
| H  | 1.571728953  | 7.234648492  | 0.354726243  |
| C  | 1.251922015  | 5.133517584  | 0.684672082  |
| H  | 2.309904430  | 4.931995960  | 0.807145845  |
| C  | 0.327659452  | 4.083462208  | 0.797226859  |
| P  | 0.913151689  | 2.376637415  | 1.150379658  |
| Rh | 0.557743890  | 0.858500502  | -0.643635484 |
| C  | -0.233467736 | -0.554004119 | 0.475075766  |
| C  | 0.264938500  | -1.801694105 | 0.454556872  |
| H  | -1.054653347 | -0.278411213 | 1.133231382  |
| H  | -0.176997341 | -2.471447964 | 1.199149805  |
| C  | 1.357966191  | -2.427119643 | -0.301994898 |
| C  | 1.943544925  | -2.139804588 | -1.480688029 |
| H  | 1.747541061  | -3.310921703 | 0.201313670  |
| H  | 2.752388195  | -2.809643599 | -1.773274644 |
| O  | 0.595671232  | -0.223514846 | -2.325776041 |
| C  | 1.681828856  | -1.090712840 | -2.534271266 |
| C  | 2.988448879  | -0.333041490 | -2.858926307 |
| H  | 1.416418124  | -1.664969468 | -3.441992326 |
| H  | 2.812803775  | 0.359602607  | -3.697700150 |
| H  | 3.336870944  | 0.239309019  | -1.990562523 |
| H  | 3.791596479  | -1.017868375 | -3.150420594 |
| C  | 2.748629608  | 2.429503481  | 1.062293653  |
| C  | 3.575009073  | 2.170580696  | 2.165920215  |
| H  | 3.139280049  | 1.983288577  | 3.141450728  |
| C  | 4.962644846  | 2.148313286  | 2.013832721  |
| H  | 5.591055270  | 1.950248473  | 2.877135693  |
| C  | 5.543120811  | 2.385230475  | 0.766365068  |
| H  | 6.623131233  | 2.370015270  | 0.655832890  |
| C  | 4.730199193  | 2.649376763  | -0.338522676 |
| H  | 5.173884950  | 2.843746587  | -1.310429701 |
| C  | 3.342711739  | 2.666763856  | -0.194582430 |
| H  | 2.722464518  | 2.898530958  | -1.058335575 |
| C  | 0.502307289  | 2.080036744  | 2.912822937  |
| C  | 0.146507007  | 3.139370415  | 3.762920588  |
| H  | 0.084394643  | 4.152123991  | 3.378242009  |
| C  | -0.118457250 | 2.899704207  | 5.111031232  |
| H  | -0.390287731 | 3.726859956  | 5.760358750  |
| C  | -0.028321746 | 1.605365602  | 5.625147017  |
| H  | -0.234300678 | 1.421737491  | 6.675647746  |
| C  | 0.332946351  | 0.548240688  | 4.788122021  |
| H  | 0.410241453  | -0.459737757 | 5.184959375  |
| C  | 0.595909582  | 0.780021627  | 3.438272844  |
| H  | 0.873439683  | -0.048652003 | 2.795799606  |
| C  | -2.447119272 | 0.479799486  | -2.315664499 |
| C  | -2.362815309 | -0.907274936 | -2.128724535 |
| H  | -1.633630050 | -1.317729039 | -1.443103323 |
| C  | -3.201743087 | -1.756944608 | -2.849621076 |
| H  | -3.127619200 | -2.830482267 | -2.703371912 |
| C  | -4.119943181 | -1.236224041 | -3.762011597 |
| H  | -4.766911085 | -1.903224484 | -4.324304473 |
| C  | -4.201135273 | 0.143341580  | -3.957748109 |
| H  | -4.908884717 | 0.554848218  | -4.671216411 |
| C  | -3.367259346 | 1.000975599  | -3.243104334 |
| H  | -3.433406127 | 2.070088324  | -3.415016564 |
| C  | -1.102308017 | 3.022289267  | -2.516769156 |
| C  | -0.093775848 | 2.830152025  | -3.477722488 |
| H  | 0.471732414  | 1.901480247  | -3.482359109 |
| C  | 0.140200597  | 3.810514836  | -4.441030477 |
| H  | 0.918070340  | 3.659219120  | -5.183645601 |
| C  | -0.631548876 | 4.974231166  | -4.461498445 |
| H  | -0.449208815 | 5.734101438  | -5.215786915 |

=====  
**6 - Aldehyde insertion product - Rhodacycloheptadiene**  
 =====

|   |              |             |              |
|---|--------------|-------------|--------------|
| C | -2.161946888 | 3.360177916 | 0.864654919  |
| C | -3.026769579 | 3.642350449 | 1.935504067  |
| H | -2.811170536 | 4.505039652 | 2.558110844  |
| C | -4.136572161 | 2.851845780 | 2.224696635  |
| H | -4.774581759 | 3.103867301 | 3.066563263  |
| C | -4.418850492 | 1.747145741 | 1.428175785  |
| H | -5.282467764 | 1.121708335 | 1.632170341  |
| C | -3.587619058 | 1.448450343 | 0.351335875  |
| H | -3.826250103 | 0.595374832 | -0.272736479 |
| C | -2.459294249 | 2.233188070 | 0.049906744  |
| P | -1.427012270 | 1.655820426 | -1.355041243 |
| C | -1.055518978 | 4.355266646 | 0.658121413  |
| C | -1.450095808 | 5.684694345 | 0.433541541  |
| H | -2.510167626 | 5.905869048 | 0.347967446  |
| C | -0.522663759 | 6.716967640 | 0.312888483  |
| H | -0.864261961 | 7.731589102 | 0.130416271  |



C -1.648577353 5.155533406 -3.522300124  
H -2.260884414 6.052233391 -3.547864644  
C -1.886289265 4.185200966 -2.549383064  
H -2.686127967 4.328670558 -1.830897771

7 - Rhodacycloheptadiene with acetate, protonated

C -1.852680811 3.469109966 1.072408214  
C -2.657537246 3.835522559 2.161510399  
H -2.354856715 4.684465836 2.767394631  
C -3.815932489 3.135940574 2.490355054  
H -4.408706946 3.441577627 3.347444583  
C -4.206267851 2.051191717 1.711341649  
H -5.110258959 1.497394294 1.946460668  
C -3.442596621 1.687381532 0.603302038  
H -3.790433378 0.873862231 -0.020985299  
C -2.268348704 2.377626779 0.264783745  
P -1.343410630 1.929631165 -1.269973335  
C -0.672589214 4.340988455 0.767707234  
C -0.954155465 5.698432382 0.534367371  
H -1.984964203 6.030966308 0.608746334  
C 0.036740484 6.606891974 0.172711529  
H -0.219324742 7.647011689 -0.005101091  
C 1.346062339 6.159140233 0.010751010  
H 2.128800034 6.841565165 -0.306598212  
C 1.656615682 4.825568140 0.265854254  
H 2.678953741 4.493575898 0.136116349  
C 0.676496311 3.910068151 0.688092617  
P 1.207694493 2.174907063 1.003091979  
Rh 0.843645072 1.065418139 -1.020545768  
C 0.052931458 -0.549811171 -0.158463903  
C 0.372022186 -1.824438867 -0.443349551  
H -0.663878409 -0.381011875 0.643606804  
H -0.089961197 -2.579244888 0.201519539  
C 1.294199342 -2.410375400 -1.418458437  
C 1.621335219 -2.090796480 -2.681542705  
H 1.783470651 -3.309814183 -1.042486717  
H 2.349236553 -2.743575537 -3.160876629  
O 0.528119897 0.114587541 -2.998236150  
C 1.107918051 -1.062243827 -3.646422041  
C 2.190830750 -0.630077223 -4.636548584  
H 0.272533657 -1.510823309 -4.205151474  
O 2.932347874 0.518176361 -1.288844974  
C 3.236241206 1.623516686 -1.855417906  
O 2.344580203 2.517704260 -1.999734609  
C 4.639903802 1.845989530 -2.357053303  
H 4.673986631 1.662256342 -3.436872554  
H 5.338807985 1.169445746 -1.863581967  
H 4.932841067 2.885129416 -2.190202813  
H 1.807600325 0.116299255 -5.342969568  
H 3.053501132 -0.216163980 -4.108882552  
H 2.526276701 -1.489326702 -5.225118053  
H 0.416746908 0.794833301 -3.676704688  
C 2.963646601 2.224553916 1.573961748  
C 3.444834690 3.301577425 2.340415241  
H 2.834430722 4.183418030 2.500718775  
C 4.715210708 3.250050633 2.912301885  
H 5.074075199 4.096202612 3.491263321  
C 5.515537021 2.117133933 2.752707269  
H 6.504306860 2.079433627 3.200384198  
C 5.029165122 1.030089731 2.026875611

H 5.635101255 0.136156651 1.909943836  
C 3.760408026 1.075870410 1.445177219  
H 3.405310479 0.226320629 0.876637445  
C 0.443095033 1.614942647 2.585310213  
C 0.043112858 2.551934913 3.550906443  
H 0.053881590 3.612073376 3.322810354  
C -0.361986034 2.133776957 4.818175371  
H -0.671845925 2.873575357 5.550836485  
C -0.363288843 0.777488544 5.147387707  
H -0.680645550 0.454145972 6.134338504  
C 0.065735857 -0.157640993 4.204738627  
H 0.093160357 -1.214089753 4.455939176  
C 0.477311696 0.255720907 2.936954139  
H 0.837257619 -0.484387726 2.231904405  
C -2.420833692 0.769388051 -2.224144933  
C -2.897791083 1.123190251 -3.497467555  
H -2.663439396 2.091150578 -3.924200270  
C -3.686933596 0.235458621 -4.232514999  
H -4.044698193 0.529562456 -5.215139107  
C -4.019411901 -1.013209895 -3.710318062  
H -4.636821805 -1.698629641 -4.283699494  
C -3.549730524 -1.378428920 -2.446486649  
H -3.796489014 -2.350727253 -2.030301543  
C -2.752848227 -0.500171310 -1.714418141  
H -2.371763683 -0.821698453 -0.754593208  
C -1.388325874 3.470903958 -2.273918630  
C -2.581365503 4.214995120 -2.335117509  
H -3.444223274 3.914401161 -1.747504802  
C -2.667116607 5.340403272 -3.151985588  
H -3.594488191 5.904902219 -3.192765518  
C -1.566466998 5.740495436 -3.916902951  
H -1.635927910 6.618335157 -4.552903407  
C -0.380736069 5.009594767 -3.854410652  
H 0.482551004 5.319292901 -4.436547845  
C -0.286589604 3.877345973 -3.039110996  
H 0.656132985 3.345967035 -2.975016931

7A - Rhodacycloheptadiene w bidentate acetate, not protonated

C -1.917154809 3.354692712 0.910746711  
C -2.854578554 3.668758015 1.909787955  
H -2.642734412 4.508251144 2.565750066  
C -4.027653569 2.940368905 2.085830056  
H -4.722052943 3.207973307 2.877078437  
C -4.295257266 1.875123678 1.232232917  
H -5.205734625 1.292323233 1.340522072  
C -3.396397006 1.564104465 0.213116824  
H -3.647149341 0.758515837 -0.464778955  
C -2.202227432 2.280791444 0.026228104  
P -1.071222785 1.837314555 -1.386489819  
C -0.748313519 4.289733373 0.795731803  
C -1.073427156 5.627649961 0.510438356  
H -2.118895857 5.885783924 0.371448297  
C -0.099055008 6.609825745 0.369198136  
H -0.387403415 7.630298557 0.133003535  
C 1.241896615 6.264230867 0.509640380  
H 2.022295948 7.007926331 0.376309437  
C 1.586105905 4.951593720 0.817948108  
H 2.633790703 4.696674717 0.913825961  
C 0.613278403 3.953052568 0.996666821  
P 1.196791388 2.223774946 1.276815650

Rh 1.110438346 1.230819757 -0.893964125  
 C 0.541768596 -0.570233386 -0.216844188  
 C 1.103832251 -1.754064973 -0.531503124  
 H -0.226345659 -0.575651794 0.558296220  
 H 0.803008962 -2.619663813 0.069097172  
 C 2.110088948 -2.026964715 -1.559739009  
 C 2.133964707 -1.493422711 -2.790533210  
 H 2.891196914 -2.738902057 -1.288775255  
 H 2.956212133 -1.743652433 -3.457118671  
 O 1.156527938 0.761987341 -2.870822821  
 C 1.059625928 -0.557561767 -3.310782691  
 C 1.052087477 -0.530389164 -4.847659203  
 H 0.088425651 -1.007436001 -3.032354461  
 O 3.272258601 0.986812870 -1.026299683  
 C 3.442656054 2.157869645 -1.512922368  
 O 2.482072245 2.980909528 -1.557221813  
 C 4.803683814 2.528832738 -2.056448773  
 H 4.893222734 2.134427796 -3.074786204  
 H 5.594541013 2.080776341 -1.449772398  
 H 4.917636010 3.614098170 -2.091700639  
 O 0.974343915 0.451824881 -5.550034820  
 O 1.117566533 -1.792336458 -5.351431713  
 C 2.849175129 2.390513996 2.096177003  
 C 3.053023052 3.335698309 3.117579704  
 H 2.271383134 4.045556122 3.369705079  
 C 4.256270522 3.375902314 3.817002874  
 H 4.401578104 4.120305211 4.595468919  
 C 5.267629936 2.457236392 3.524432318  
 H 6.206201202 2.488332269 4.071545167  
 C 5.063279398 1.499727149 2.533300933  
 H 5.841687849 0.777371834 2.302944649  
 C 3.861323685 1.461151710 1.820685000  
 H 3.723286591 0.732548649 1.031876858  
 C 0.296114172 1.564779026 2.753386330  
 C -0.360642105 2.392218914 3.674758973  
 H -0.445943661 3.456612798 3.483023277  
 C -0.901198567 1.862910826 4.847257908  
 H -1.410657101 2.520764500 5.546558468  
 C -0.785181244 0.500023058 5.125029196  
 H -1.206861500 0.089571407 6.038284206  
 C -0.111070974 -0.327919581 4.226080112  
 H 0.002318670 -1.387595867 4.438074058  
 C 0.430222981 0.198795459 3.052727366  
 H 0.972452713 -0.453048546 2.376222050  
 C -2.008432482 0.587279659 -2.369345077  
 C -2.437250489 0.878142351 -3.672483062  
 H -2.226583406 1.845359486 -4.111724574  
 C -3.120814292 -0.078464066 -4.425319184  
 H -3.434326980 0.164821163 -5.436692898  
 C -3.393599915 -1.336070350 -3.889388464  
 H -3.924987214 -2.079191087 -4.477732514  
 C -2.968160602 -1.638889760 -2.595036551  
 H -3.161341496 -2.620153827 -2.170311049  
 C -2.273336867 -0.690583823 -1.845341762  
 H -1.922161774 -0.957453920 -0.856197649  
 C -1.097593687 3.321298193 -2.470839674  
 C -2.177859555 4.218784874 -2.441253280  
 H -2.990233321 4.074570318 -1.735335175  
 C -2.219573083 5.297127220 -3.323480114  
 H -3.059888311 5.985918657 -3.293438062  
 C -1.186168523 5.487322354 -4.243856787  
 H -1.219139462 6.328270940 -4.931996432

C -0.119006285 4.590623481 -4.284338409  
 H 0.680817506 4.724735710 -5.006956873  
 C -0.067527149 3.506037129 -3.406878413  
 H 0.743245311 2.788544238 -3.463701037  
 C 1.104286029 -1.879015491 -6.782089818  
 H 1.183925774 -2.941574109 -7.016894669  
 H 0.176620373 -1.466805376 -7.189626703  
 H 1.945696893 -1.329108954 -7.213367255

=====  
**7A'** - Rhodacycloheptadiene with acetate and H2  
 coordinated  
 =====

C -2.363869594 2.151468970 -0.403097199  
 P -1.084770631 1.431543884 -1.545531594  
 C -1.039379784 4.340908874 0.119032090  
 P 0.914182012 2.538395094 1.249804301  
 Rh 1.002748691 0.940058973 -0.563389901  
 C 0.200477737 -0.559152868 0.498617781  
 C 0.633958587 -1.831051184 0.574190947  
 H -0.645536544 -0.278308937 1.128522890  
 H 0.143512986 -2.466441515 1.320757279  
 C 1.702542648 -2.488078582 -0.183651705  
 C 1.946597167 -2.343831807 -1.494704307  
 H 2.329634595 -3.175351190 0.385934415  
 H 2.784259938 -2.876511437 -1.938603476  
 O 1.281079833 -0.109789448 -2.287479027  
 C 1.089912378 -1.483548866 -2.402413003  
 C 1.272746908 -1.839454301 -3.886551530  
 H 0.041943401 -1.770267715 -2.193431076  
 O 1.265069005 -1.059532921 -4.811739373  
 O 1.388949999 -3.182763432 -4.057659933  
 C 2.564077522 2.977323574 1.966580178  
 C 2.736130030 3.182374768 3.344197548  
 H 1.901801376 3.064208548 4.025519402  
 C 3.983512584 3.539842755 3.858963331  
 H 4.096363275 3.689605517 4.929401155  
 C 5.075602109 3.703576338 3.008217202  
 H 6.046518810 3.979638824 3.410827944  
 C 4.913708876 3.505129047 1.636288785  
 H 5.756295649 3.619588422 0.960188909  
 C 3.671283492 3.142021765 1.118015004  
 H 3.587399094 2.968391071 0.052006262  
 C -0.056040070 2.197739058 2.776555465  
 C -0.827589820 3.177785912 3.416437534  
 H -0.917748332 4.166834050 2.979749338  
 C -1.465782808 2.898358031 4.625237745  
 H -2.060528700 3.667997266 5.109675953  
 C -1.334045821 1.640196349 5.213971756  
 H -1.831451093 1.423744310 6.155496982  
 C -0.550852857 0.664904651 4.595013749  
 H -0.430471278 -0.312383793 5.054304841  
 C 0.088519724 0.940184157 3.386046172  
 H 0.707951360 0.180973687 2.920018109  
 C -1.974049682 0.012785453 -2.338080972  
 C -2.424838074 0.098994744 -3.663949486  
 H -2.225126810 0.985908104 -4.252205975  
 C -3.126554666 -0.956941923 -4.248288924  
 H -3.457873785 -0.869746323 -5.279273625  
 C -3.397589752 -2.113873612 -3.519664586  
 H -3.943882562 -2.934438827 -3.976740250  
 C -2.955178646 -2.212633879 -2.200231872  
 H -3.149102858 -3.112290330 -1.622704183

C -2.244951126 -1.163688582 -1.616734967  
H -1.885236347 -1.271247482 -0.601276417  
C -0.916502618 2.605635668 -2.949542588  
C -1.842819023 3.629426587 -3.191203563  
H -2.682325471 3.776110004 -2.519313849  
C -1.698472374 4.458977080 -4.303895062  
H -2.417729363 5.254575588 -4.479465168  
C -0.636926575 4.264305418 -5.188149300  
H -0.525523324 4.911545950 -6.054191333  
C 0.272815053 3.228330954 -4.965836706  
H 1.089542375 3.058077891 -5.661407687  
C 0.140092151 2.395909147 -3.854029732  
H 0.824486590 1.563493743 -3.701960356  
C -3.555116432 1.437644239 -0.181564036  
C -2.176720479 3.374169962 0.291675552  
O 4.056300979 1.338576080 -1.482561202  
O 2.877810735 0.291795285 0.142795713  
C 3.939877994 0.506700351 -0.567431089  
C 5.130276673 -0.351907655 -0.154076343  
H 4.867338221 -1.408753416 -0.259245688  
H 5.998334543 -0.119689649 -0.773448186  
H 5.367810408 -0.175322448 0.899893627  
H 1.695923635 2.518888899 -1.581882962  
H 2.376098185 2.124545163 -1.603147862  
H -3.729411834 0.512917829 -0.714926067  
C -4.538727789 1.887878372 0.695420176  
C -4.360481215 3.091324037 1.367740500  
C -3.196262991 3.820701518 1.151156591  
C -1.396221739 5.582116422 -0.438117486  
C -0.488397657 6.628799379 -0.566750790  
C 0.811883699 6.452915412 -0.104623569  
C 1.183624868 5.238937358 0.469338027  
C 0.286609387 4.162789530 0.588632879  
H -5.441245301 1.300332704 0.837786177  
H -5.118194056 3.466011649 2.050085465  
H -3.057822769 4.768901182 1.662169621  
H -2.418735810 5.717496597 -0.777797331  
H -0.799361052 7.568078824 -1.014752047  
H 1.540700804 7.254789154 -0.181087288  
H 2.196455905 5.131319713 0.835292704  
C 1.507947420 -3.613218624 -5.420214236  
H 1.602597407 -4.699429965 -5.381904083  
H 0.623688146 -3.326926455 -5.997062063  
H 2.388684513 -3.169347645 -5.892643588

=====  
**7A'-TS - H2 activation TS**  
=====

C -2.453079430 2.123326385 -0.515094437  
P -1.072781945 1.739428594 -1.683065188  
C -1.351028837 4.325259693 0.309694133  
P 0.895607004 2.672079487 1.000725728  
Rh 0.788754631 0.926222506 -0.528344037  
C -0.466118916 -0.237194325 0.622955636  
C -0.325828914 -1.541001864 0.941768186  
H -1.327075051 0.260796531 1.070341321  
H -1.051409838 -1.951078448 1.652588298  
C 0.734883573 -2.494229800 0.592973971  
C 1.299871214 -2.751888514 -0.597507845  
H 1.085062978 -3.099494932 1.431171943  
H 2.084561629 -3.501344850 -0.653631661  
O 1.079773223 -0.709615059 -1.987586656  
C 0.869532613 -2.132489190 -1.899531505

C 1.609513621 -2.698233170 -3.113863412  
H -0.201810733 -2.302253058 -2.052356964  
O 2.214215512 -1.968389842 -3.880753275  
O 1.511549076 -4.015322285 -3.225628959  
C 2.665041088 3.165433600 1.200462444  
C 3.282690659 3.161749732 2.460556770  
H 2.735594817 2.837311236 3.337955060  
C 4.607795811 3.582180484 2.600139136  
H 5.068817790 3.571668790 3.583454401  
C 5.332178222 4.019067886 1.491533954  
H 6.360727276 4.348374358 1.604329648  
C 4.722824616 4.034017796 0.234405015  
H 5.274894050 4.373587032 -0.636990585  
C 3.404343566 3.607328542 0.088622884  
H 2.946584889 3.628741373 -0.893764704  
C 0.353633006 2.256711483 2.701482319  
C -0.382346663 3.159982931 3.481413667  
H -0.687196121 4.116490204 3.071443052  
C -0.714176706 2.839977214 4.798268478  
H -1.285453713 3.545381088 5.394411960  
C -0.306952388 1.624784437 5.348285509  
H -0.563617487 1.379567497 6.374746571  
C 0.438414200 0.727379892 4.580434289  
H 0.765329087 -0.216074996 5.008033307  
C 0.766952694 1.035239430 3.261992767  
H 1.348367109 0.338054250 2.668744824  
C -1.711134498 0.481091034 -2.868480275  
C -1.760333606 0.755665717 -4.243484903  
H -1.430386102 1.714899609 -4.624792517  
C -2.234960037 -0.202603470 -5.141140278  
H -2.261921228 0.028468080 -6.201949668  
C -2.676873562 -1.441688377 -4.681628223  
H -3.055108831 -2.181093659 -5.381375431  
C -2.626944774 -1.728007374 -3.315298445  
H -2.965398528 -2.692068908 -2.945705691  
C -2.135271178 -0.781947295 -2.417079686  
H -2.069176102 -1.032149728 -1.363303326  
C -0.907224230 3.241282338 -2.729579088  
C -2.070175623 3.945413547 -3.088537308  
H -3.034769226 3.643272372 -2.690978215  
C -1.996189882 5.029654557 -3.960119122  
H -2.901641389 5.565127311 -4.230474369  
C -0.763602334 5.424023426 -4.486116174  
H -0.707177738 6.270117873 -5.164854582  
C 0.393124683 4.727064209 -4.139777654  
H 1.353326172 5.025643073 -4.550322919  
C 0.323195208 3.638932855 -3.267132076  
H 1.224762943 3.096177430 -3.008298558  
C -3.585960313 1.297348989 -0.453049695  
C -2.351273306 3.207949238 0.393940074  
H 1.669673128 -0.555376253 -2.751358858  
O 3.824901179 0.660678267 -1.158779034  
O 2.478887567 0.116725779 0.552941554  
C 3.608864838 0.114396769 -0.021985371  
C 4.768670011 -0.549081610 0.677114612  
H 4.465474847 -1.533393219 1.042455520  
H 5.623817095 -0.636613488 0.007306584  
H 5.047764225 0.056397014 1.545653557  
H 1.865428328 1.831306743 -1.590430957  
H 2.761161191 1.287290395 -1.456684887  
H -3.710349683 0.497762163 -1.170734159  
C -4.579880595 1.486236099 0.505908366

|   |              |              |              |
|---|--------------|--------------|--------------|
| C | -4.458090111 | 2.517900414  | 1.430064877  |
| C | -3.363085566 | 3.373970995  | 1.354073624  |
| C | -1.911385464 | 5.584054805  | 0.025074800  |
| C | -1.145835040 | 6.745586271  | -0.025088795 |
| C | 0.219412533  | 6.667945531  | 0.232356266  |
| C | 0.797142951  | 5.434775020  | 0.525437624  |
| C | 0.040382256  | 4.249516327  | 0.562105347  |
| H | -5.442165347 | 0.826541829  | 0.521783648  |
| H | -5.216565956 | 2.673112259  | 2.191315125  |
| H | -3.287895818 | 4.207661854  | 2.045413135  |
| H | -2.977960017 | 5.638022499  | -0.169166735 |
| H | -1.615844658 | 7.696846319  | -0.255269876 |
| H | 0.839479934  | 7.559061928  | 0.214534905  |
| H | 1.856911624  | 5.403009562  | 0.741779562  |
| C | 2.192310892  | -4.609234454 | -4.359994637 |
| H | 2.007501493  | -5.678801401 | -4.278441658 |
| H | 1.784418707  | -4.212474014 | -5.291593257 |
| H | 3.261244314  | -4.393037514 | -4.310269146 |

**8 - Protonated Rhodacycloheptadienehydride, acetic acid adduct (H<sub>2</sub> activation product)**

|    |              |              |              |
|----|--------------|--------------|--------------|
| C  | -1.890818428 | 3.865073863  | 0.756646400  |
| C  | -2.565590339 | 4.640233277  | 1.711420516  |
| H  | -2.294171048 | 5.687088552  | 1.812117236  |
| C  | -3.546803261 | 4.099562653  | 2.538204344  |
| H  | -4.042108606 | 4.727244247  | 3.273022927  |
| C  | -3.880258341 | 2.754705184  | 2.412783403  |
| H  | -4.642246322 | 2.311390855  | 3.046292279  |
| C  | -3.241474511 | 1.972592158  | 1.450913211  |
| H  | -3.539588006 | 0.937351787  | 1.349531580  |
| C  | -2.248336104 | 2.499805535  | 0.606919280  |
| P  | -1.534684881 | 1.404893201  | -0.718772949 |
| C  | -0.879861755 | 4.583500618  | -0.082726649 |
| C  | -1.356219432 | 5.610853249  | -0.914215884 |
| H  | -2.422011670 | 5.817471999  | -0.922224017 |
| C  | -0.508172774 | 6.343000817  | -1.740337812 |
| H  | -0.910155175 | 7.124178023  | -2.378226668 |
| C  | 0.854379805  | 6.054296253  | -1.745927043 |
| H  | 1.533978497  | 6.607657766  | -2.387863276 |
| C  | 1.353013414  | 5.060075974  | -0.903545889 |
| H  | 2.420062452  | 4.869856516  | -0.895382713 |
| C  | 0.511902729  | 4.329091912  | -0.040764358 |
| P  | 1.221764143  | 2.920493239  | 0.920834590  |
| Rh | 0.760411193  | 0.990034416  | -0.652504752 |
| C  | 0.357476609  | -0.568087472 | -1.915502535 |
| C  | 0.960364789  | -0.926061387 | -3.074392967 |
| H  | -0.468992886 | -1.216177463 | -1.626357134 |
| H  | 0.567929676  | -1.834994589 | -3.541439040 |
| C  | 2.113343858  | -0.408694975 | -3.822406654 |
| C  | 2.719981130  | 0.786904285  | -3.950382550 |
| H  | 2.563642675  | -1.186943963 | -4.439495377 |
| H  | 3.579185126  | 0.798078076  | -4.621276146 |
| O  | 1.334984159  | 2.242969300  | -2.538472787 |
| C  | 2.457980975  | 2.173495595  | -3.442521864 |
| C  | 3.719102407  | 2.793097777  | -2.823452480 |
| H  | 2.178392849  | 2.771587591  | -4.325780501 |
| O  | 2.913170832  | 0.459673594  | -0.528808971 |
| C  | 3.464877844  | -0.649487650 | -0.497207566 |
| O  | 2.840933478  | -1.781058841 | -0.739162755 |
| C  | 4.923988192  | -0.809529301 | -0.178491222 |
| H  | 5.048596855  | -1.549762172 | 0.617430377  |

|   |              |              |              |
|---|--------------|--------------|--------------|
| H | 5.354029943  | 0.146207656  | 0.117515302  |
| H | 5.444066669  | -1.193928669 | -1.061852733 |
| H | 3.568270683  | 3.857722219  | -2.619254295 |
| H | 3.971740163  | 2.283813155  | -1.890991320 |
| H | 4.564224563  | 2.710897873  | -3.514188471 |
| H | 1.140888403  | 3.177816519  | -2.368962295 |
| H | 1.939636485  | -1.571976214 | -1.095986165 |
| H | 0.418058029  | 0.089074250  | 0.532076177  |
| C | 2.955070821  | 3.413600541  | 1.339003246  |
| C | 3.382697367  | 4.745009270  | 1.478349983  |
| H | 2.715058242  | 5.567857245  | 1.247033715  |
| C | 4.672104472  | 5.034284716  | 1.925736981  |
| H | 4.985992969  | 6.069987214  | 2.020863678  |
| C | 5.548876252  | 4.003015470  | 2.263023284  |
| H | 6.550539546  | 4.231296876  | 2.615365131  |
| C | 5.125015002  | 2.678172444  | 2.159077714  |
| H | 5.792941206  | 1.869408155  | 2.442659682  |
| C | 3.840774793  | 2.385799898  | 1.699557129  |
| H | 3.519375060  | 1.353940837  | 1.629330435  |
| C | 0.499431512  | 2.973728910  | 2.617138766  |
| C | 0.495813768  | 4.161836156  | 3.366377896  |
| H | 0.826964541  | 5.092605542  | 2.915482712  |
| C | 0.076240359  | 4.159313839  | 4.694136320  |
| H | 0.078278579  | 5.086493987  | 5.260451684  |
| C | -0.335854274 | 2.968098490  | 5.299058581  |
| H | -0.655230057 | 2.966255092  | 6.337022185  |
| C | -0.329117629 | 1.783006431  | 4.564477251  |
| H | -0.644348682 | 0.852541949  | 5.028132892  |
| C | 0.086709183  | 1.784764610  | 3.230331639  |
| H | 0.093406785  | 0.857479922  | 2.664814799  |
| C | -2.517323532 | -0.150136475 | -0.550789761 |
| C | -2.177925907 | -1.090762571 | 0.437301510  |
| H | -1.308871628 | -0.925353566 | 1.066595139  |
| C | -2.943951040 | -2.241098034 | 0.617518410  |
| H | -2.667852339 | -2.954136818 | 1.388986028  |
| C | -4.057043677 | -2.478274975 | -0.193773733 |
| H | -4.651233581 | -3.376742868 | -0.056850993 |
| C | -4.396095466 | -1.555488737 | -1.182633300 |
| H | -5.256529511 | -1.731740334 | -1.821530042 |
| C | -3.635339434 | -0.397199043 | -1.360797441 |
| H | -3.920285286 | 0.310613497  | -2.131192953 |
| C | -2.148403356 | 2.159745617  | -2.285911840 |
| C | -3.264444003 | 3.014882440  | -2.285511677 |
| H | -3.749976578 | 3.276841117  | -1.351802795 |
| C | -3.764535304 | 3.528300703  | -3.482439898 |
| H | -4.628791242 | 4.186223997  | -3.463287348 |
| C | -3.161240939 | 3.196571052  | -4.697152811 |
| H | -3.550447569 | 3.598394761  | -5.628109637 |
| C | -2.058801420 | 2.340985279  | -4.706736267 |
| H | -1.587973545 | 2.069286043  | -5.647351436 |
| C | -1.553083142 | 1.823852308  | -3.512793155 |
| H | -0.700055488 | 1.158461948  | -3.534182160 |

**9 - Same as structure 12, without acetic acid**

|    |              |              |              |
|----|--------------|--------------|--------------|
| Rh | 0.394191989  | -0.146600475 | -0.216205931 |
| P  | -0.720556633 | -0.776186919 | 1.690065799  |
| C  | -1.894471574 | 0.560754557  | 2.200493727  |
| C  | -1.514950978 | 1.389641373  | 3.271626276  |
| H  | -0.599169138 | 1.182279123  | 3.812520529  |
| C  | -2.300716267 | 2.466022663  | 3.678779275  |



|   |              |              |              |   |              |              |              |
|---|--------------|--------------|--------------|---|--------------|--------------|--------------|
| H | 4.906268277  | 2.570095703  | 3.923381522  | C | 5.705304238  | -4.009297743 | 1.228888923  |
| C | 3.609161329  | 4.179855650  | 4.506478041  | H | 5.633424975  | -5.043320648 | 0.905227764  |
| H | 4.434603564  | 4.862087475  | 4.688593911  | C | 6.170726885  | -3.718880980 | 2.510157464  |
| C | 2.295720360  | 4.600364374  | 4.713946487  | H | 6.460021476  | -4.523911488 | 3.178779015  |
| H | 2.092191679  | 5.609860513  | 5.058330868  | C | 6.269725343  | -2.390681803 | 2.913764384  |
| C | 1.242658513  | 3.712466652  | 4.476143593  | H | 6.645112075  | -2.139276869 | 3.901445014  |
| H | 0.215804975  | 4.028146604  | 4.638542470  | C | 5.894490134  | -1.370652329 | 2.039071445  |
| C | 1.505158463  | 2.417702221  | 4.028784268  | H | 6.000747329  | -0.342459938 | 2.364145696  |
| H | 0.679218367  | 1.736406836  | 3.842531271  | P | 4.870570568  | -0.264722689 | -0.356750598 |
| C | 4.944628551  | 0.135170928  | 3.047935877  | C | 2.539040265  | 2.398752833  | -1.305561836 |
| C | 5.541705099  | 0.199149437  | 1.780823176  | C | 1.730314701  | 2.012406524  | -0.261962335 |
| H | 4.920709425  | 0.277858795  | 0.894221278  | C | 0.632111260  | 1.066425836  | -0.428664356 |
| C | 6.932651751  | 0.148341612  | 1.655235426  | H | 3.447785877  | 2.949456865  | -1.070612518 |
| H | 7.384707378  | 0.196828851  | 0.668388872  | H | 2.013841443  | 2.291297469  | 0.750519978  |
| C | 7.740483976  | 0.030045132  | 2.786130755  | H | 0.106102750  | 0.991422845  | -1.374877894 |
| H | 8.821085919  | -0.010891797 | 2.684866933  | H | -0.332164591 | -0.651083548 | 0.417715495  |
| C | 7.151666708  | -0.039643505 | 4.051767384  | C | 1.613727250  | 3.834998869  | -3.106028929 |
| H | 7.772922424  | -0.133446576 | 4.938083172  | C | 2.153946112  | 2.435988082  | -2.762682220 |
| C | 5.764542927  | 0.010775020  | 4.183707414  | H | 0.708737651  | 4.064495545  | -2.536181851 |
| H | 5.319955427  | -0.047146056 | 5.172592902  | H | 2.366709905  | 4.599938958  | -2.890368197 |
| C | 0.158765713  | -2.815463744 | 3.133408152  | H | 1.359736419  | 3.887103473  | -4.171699838 |
| C | -0.788917283 | -1.945525055 | 3.686986699  | H | 1.374829284  | 1.690976994  | -2.975763375 |
| H | -0.828113210 | -0.911032769 | 3.361271202  | O | 3.328017686  | 2.143887083  | -3.514952988 |
| C | -1.671389686 | -2.396162017 | 4.669874677  | H | 3.174981194  | 2.416626868  | -4.429357282 |
| H | -2.399008203 | -1.710776407 | 5.094450078  | C | 5.486410167  | 1.276159325  | 0.452419979  |
| C | -1.615161116 | -3.718549882 | 5.108748933  | C | 4.831016896  | 1.746458369  | 1.606249865  |
| H | -2.301792474 | -4.067689827 | 5.874426118  | H | 3.999189239  | 1.181925417  | 2.020023887  |
| C | -0.669686473 | -4.592451271 | 4.566681159  | C | 5.245382721  | 2.921157645  | 2.232032153  |
| H | -0.618226489 | -5.621940993 | 4.909155837  | H | 4.737002111  | 3.264515170  | 3.128595148  |
| C | 0.215086528  | -4.145287057 | 3.587723754  | C | 6.310222595  | 3.656291718  | 1.704572840  |
| H | 0.954481205  | -4.829456568 | 3.180953845  | H | 6.630913909  | 4.574397199  | 2.187939243  |
| C | 0.645046625  | -3.092782572 | 0.268133988  | C | 6.957891234  | 3.206304367  | 0.555142862  |
| C | 1.150455009  | -2.678415505 | -0.978119787 | H | 7.783878768  | 3.774883091  | 0.137790674  |
| H | 1.877505016  | -1.872782253 | -1.020517855 | C | 6.553212462  | 2.023308651  | -0.068734559 |
| C | 0.716233735  | -3.284925331 | -2.155913055 | H | 7.069919396  | 1.688900757  | -0.961265918 |
| H | 1.120758735  | -2.959742134 | -3.110305682 | C | 5.920906706  | -0.475187341 | -1.843816558 |
| C | -0.241958393 | -4.301047554 | -2.112200624 | C | 5.397664355  | -0.227029082 | -3.118321836 |
| H | -0.583706007 | -4.769510809 | -3.030194600 | H | 4.370121382  | 0.101825111  | -3.226796656 |
| C | -0.762611235 | -4.703617172 | -0.882781957 | C | 6.210006157  | -0.367314726 | -4.245862735 |
| H | -1.514980402 | -5.485609100 | -0.838744242 | H | 5.798408480  | -0.174807808 | -5.232585681 |
| C | -0.324128539 | -4.106543170 | 0.301433541  | C | 7.544014494  | -0.748949037 | -4.109533871 |
| H | -0.745119253 | -4.433702095 | 1.245089190  | H | 8.173024999  | -0.856361251 | -4.988692620 |

---

**10 - Product complex**

---

|    |             |              |              |   |              |              |              |
|----|-------------|--------------|--------------|---|--------------|--------------|--------------|
| C  | 0.397406711 | 0.138132527  | 0.562860332  | H | 9.111834541  | -1.289333963 | -2.727595421 |
| H  | 0.747591593 | 0.300962087  | 1.577795488  | C | 7.265890202  | -0.862959216 | -1.711258814 |
| Rh | 2.559164926 | -0.082072707 | -0.482687389 | H | 7.681314916  | -1.067017030 | -0.728771824 |
| P  | 2.301691828 | -2.355125384 | -0.676626079 | C | 2.079316785  | -3.338145738 | 0.858496293  |
| C  | 3.616143641 | -3.272541068 | -1.599319660 | C | 1.940829580  | -2.694779058 | 2.095710301  |
| C  | 3.345863873 | -3.805760628 | -2.869977744 | H | 1.999858524  | -1.612431514 | 2.141681856  |
| H  | 2.358643719 | -3.693061282 | -3.301800764 | C | 1.756562982  | -3.436664128 | 3.263815869  |
| C  | 4.319260829 | -4.497657327 | -3.592489706 | H | 1.655181141  | -2.925722617 | 4.217044320  |
| H  | 4.078883282 | -4.899323180 | -4.572201261 | C | 1.710220553  | -4.829540275 | 3.207411193  |
| C  | 5.586010719 | -4.676133851 | -3.043361718 | H | 1.565790364  | -5.407105462 | 4.115798161  |
| H  | 6.354469618 | -5.215992040 | -3.588355011 | C | 1.858634341  | -5.481310775 | 1.979961163  |
| C  | 5.863476166 | -4.160649885 | -1.777979048 | H | 1.830781771  | -6.566088570 | 1.932793063  |
| H  | 6.850218369 | -4.299489311 | -1.346547552 | C | 2.048263866  | -4.743098745 | 0.812354274  |
| C  | 4.905707704 | -3.448940539 | -1.038896213 | H | 2.177608378  | -5.260326118 | -0.134306423 |
| C  | 5.406632090 | -1.648904293 | 0.753670638  | C | 0.762198072  | -2.595795040 | -1.663772223 |
| C  | 5.312751441 | -3.001143651 | 0.334534800  | C | 0.607815607  | -1.837529341 | -2.839993131 |
|    |             |              |              | H | 1.402194906  | -1.164001459 | -3.152845128 |
|    |             |              |              | C | -0.549715653 | -1.946576425 | -3.609054936 |
|    |             |              |              | H | -0.647593403 | -1.365043448 | -4.521566664 |

|   |              |              |              |
|---|--------------|--------------|--------------|
| C | -1.582225347 | -2.798572677 | -3.206460641 |
| H | -2.486930045 | -2.879129510 | -3.801459452 |
| C | -1.444448996 | -3.541833988 | -2.034416018 |
| H | -2.243549056 | -4.202874995 | -1.711669437 |
| C | -0.280340100 | -3.445324665 | -1.266364042 |
| H | -0.192650919 | -4.031976648 | -0.358346878 |

**Table S3.** Optimized structures of the initial complex and oxidative addition transition state for Cycle B (see Figure 4 in the main text).

**3A - Rh(I)BIPHEP - acetylene + aldehyde adduct**

|    |              |              |              |
|----|--------------|--------------|--------------|
| Rh | 0.263710337  | -0.188925662 | -0.185528660 |
| P  | -0.700315801 | 0.423198793  | 1.909550518  |
| C  | -2.135846792 | 1.579379179  | 1.826965228  |
| C  | -1.999634620 | 2.895563584  | 2.296991898  |
| H  | -1.073812320 | 3.207287759  | 2.764507930  |
| C  | -3.038896622 | 3.818644701  | 2.188476120  |
| H  | -2.903082140 | 4.828980804  | 2.562846788  |
| C  | -4.244044429 | 3.434060679  | 1.608943355  |
| H  | -5.063913959 | 4.140287525  | 1.516513231  |
| C  | -4.398417876 | 2.126947685  | 1.154682968  |
| H  | -5.340599853 | 1.820609020  | 0.711638654  |
| C  | -3.363805733 | 1.183259141  | 1.244414187  |
| C  | -3.135764722 | -0.891310254 | -0.299619678 |
| C  | -3.702211089 | -0.211344971 | 0.808414674  |
| C  | -4.742441608 | -0.831617968 | 1.518495591  |
| H  | -5.175598044 | -0.302676629 | 2.362194736  |
| C  | -5.226798605 | -2.091201636 | 1.173761191  |
| H  | -6.029470687 | -2.541958142 | 1.749240671  |
| C  | -4.677432670 | -2.751209458 | 0.079037505  |
| H  | -5.048126536 | -3.726236173 | -0.223075934 |
| C  | -3.648360515 | -2.151832989 | -0.646727046 |
| H  | -3.254436153 | -2.675290747 | -1.508858820 |
| P  | -1.738806972 | -0.165725741 | -1.282898809 |
| C  | 1.379434221  | 0.490724953  | -1.931230752 |
| C  | 1.480283796  | -0.747408125 | -1.945897025 |
| H  | 1.482446473  | 1.514586321  | -2.234313255 |
| H  | 1.735928590  | -1.741141405 | -2.254313326 |
| C  | 4.353490493  | -0.732562097 | 1.803427511  |
| C  | 3.236407407  | -0.208271770 | 0.965051030  |
| H  | 4.675052444  | 0.053716977  | 2.498436831  |
| H  | 4.047791687  | -1.620731521 | 2.358250620  |
| H  | 5.217434780  | -0.958346622 | 1.165782983  |
| H  | 3.446513856  | 0.677193610  | 0.340847503  |
| O  | 2.119515261  | -0.714650478 | 0.947291493  |
| C  | -1.612026600 | -1.252526117 | -2.772847958 |
| C  | -1.986536696 | -0.832574942 | -4.056494376 |
| H  | -2.390390915 | 0.161002341  | -4.212997480 |
| C  | -1.836345700 | -1.686464266 | -5.153643235 |
| H  | -2.127402666 | -1.341369913 | -6.141492043 |
| C  | -1.317861737 | -2.969022505 | -4.986369912 |
| H  | -1.208310093 | -3.630961925 | -5.840119141 |
| C  | -0.937384183 | -3.396822598 | -3.710908878 |
| H  | -0.530948227 | -4.394211340 | -3.568612246 |
| C  | -1.073653422 | -2.543919616 | -2.617221440 |
| H  | -0.759067942 | -2.882339149 | -1.633021345 |
| C  | -2.413501532 | 1.428488020  | -1.898730610 |

|   |              |              |              |
|---|--------------|--------------|--------------|
| C | -1.626104024 | 2.586424349  | -1.884768003 |
| H | -0.627539008 | 2.543730488  | -1.462912256 |
| C | -2.126115289 | 3.791047285  | -2.384596164 |
| H | -1.505950848 | 4.682597241  | -2.363014262 |
| C | -3.418419380 | 3.850318787  | -2.906236900 |
| H | -3.807623584 | 4.786249377  | -3.296084504 |
| C | -4.213851035 | 2.701269760  | -2.918906133 |
| H | -5.222652463 | 2.741524631  | -3.319607188 |
| C | -3.719431177 | 1.499766786  | -2.414165099 |
| H | -4.350500303 | 0.615240616  | -2.422153759 |
| C | 0.576252674  | 1.358784464  | 2.860361252  |
| C | 1.330022444  | 2.337182963  | 2.186494782  |
| H | 1.140806710  | 2.527603594  | 1.132618418  |
| C | 2.308225291  | 3.070283354  | 2.857919772  |
| H | 2.870755947  | 3.833284047  | 2.326834556  |
| C | 2.562368204  | 2.825240764  | 4.211224647  |
| H | 3.323834206  | 3.394578432  | 4.735935272  |
| C | 1.828824638  | 1.847440795  | 4.883462272  |
| H | 2.020356759  | 1.649540689  | 5.934206316  |
| C | 0.840850212  | 1.118130669  | 4.215406097  |
| H | 0.278727972  | 0.363827818  | 4.755814012  |
| C | -1.214521664 | -0.938812246 | 3.027136379  |
| C | -0.651831295 | -2.211074768 | 2.846332877  |
| H | 0.050748071  | -2.379404155 | 2.034368311  |
| C | -0.988782756 | -3.258356522 | 3.705389663  |
| H | -0.549606472 | -4.240471980 | 3.555914812  |
| C | -1.889907989 | -3.045628570 | 4.750248327  |
| H | -2.154149987 | -3.861675370 | 5.416300465  |
| C | -2.454406725 | -1.780927234 | 4.935623435  |
| H | -3.156875206 | -1.611409198 | 5.746733775  |
| C | -2.121002761 | -0.731051176 | 4.079544163  |
| H | -2.569681818 | 0.247425498  | 4.227239118  |

**3A-TS - Oxidative addition transition state (acetylene-aldehyde coupling)**

|    |             |              |              |
|----|-------------|--------------|--------------|
| C  | 0.246582771 | -1.003288289 | 0.486454381  |
| C  | 0.202634741 | 0.541740763  | 1.816511885  |
| Rh | 2.296293593 | 0.084189502  | 0.303344112  |
| P  | 3.230619882 | -0.391267251 | -1.722422413 |
| C  | 4.401969676 | 0.948281388  | -2.209013952 |
| C  | 4.015626087 | 1.898052548  | -3.167673393 |
| H  | 3.042784668 | 1.823799800  | -3.638808330 |
| C  | 4.868351811 | 2.933560138  | -3.548666335 |
| H  | 4.541208746 | 3.651767348  | -4.294443996 |
| C  | 6.134101357 | 3.030776356  | -2.978140289 |
| H  | 6.810839554 | 3.829071147  | -3.267088079 |
| C  | 6.534261241 | 2.086109222  | -2.034367346 |
| H  | 7.524135193 | 2.155336106  | -1.593660062 |
| C  | 5.691286361 | 1.041233814  | -1.624570643 |
| C  | 5.810146296 | -0.206025689 | 0.647767934  |
| C  | 6.277883141 | 0.044766934  | -0.667382230 |
| C  | 7.428888146 | -0.629838474 | -1.102813390 |
| H  | 7.791678684 | -0.439282800 | -2.108365238 |
| C  | 8.101030348 | -1.539516913 | -0.288825275 |
| H  | 8.985443019 | -2.047393862 | -0.661975966 |
| C  | 7.634548037 | -1.786095062 | 0.998989036  |
| H  | 8.150063850 | -2.486314832 | 1.649327492  |
| C  | 6.499943594 | -1.119746567 | 1.459693997  |
| H  | 6.153817208 | -1.306609674 | 2.469816941  |
| P  | 4.313540007 | 0.622063077  | 1.321313879  |

|   |              |              |              |         |         |         |         |         |         |
|---|--------------|--------------|--------------|---------|---------|---------|---------|---------|---------|
| C | 1.312027895  | -1.677364039 | 0.202445960  | 48.15   | 56.21   | 58.36   | 60.00   | 66.05   | 73.44   |
| H | -0.804377211 | -1.149123450 | 0.266691612  | 74.27   | 79.60   | 86.17   | 89.33   | 101.20  | 105.78  |
| H | 1.607387452  | -2.634610096 | -0.201858969 | 116.34  | 118.18  | 131.41  | 148.22  | 149.90  | 165.91  |
| C | -1.151752843 | 1.166241316  | 1.567042711  | 173.52  | 192.24  | 204.38  | 209.61  | 218.26  | 224.00  |
| H | -1.312932448 | 1.920991168  | 2.346119288  | 231.75  | 236.87  | 238.67  | 245.68  | 252.05  | 258.19  |
| H | -1.182485143 | 1.670633624  | 0.597939569  | 259.74  | 263.98  | 265.21  | 295.43  | 334.30  | 357.82  |
| H | -1.959075584 | 0.431692077  | 1.630317740  | 367.01  | 410.55  | 411.38  | 416.41  | 417.45  | 424.95  |
| H | 0.230012530  | -0.221451817 | 2.606886644  | 438.20  | 438.81  | 449.87  | 459.00  | 465.84  | 503.38  |
| O | 1.247721709  | 1.303400922  | 1.710217610  | 505.46  | 511.69  | 520.84  | 528.79  | 541.49  | 561.47  |
| C | 4.186086302  | 0.106568017  | 3.079411565  | 573.55  | 604.66  | 617.15  | 628.35  | 629.63  | 630.50  |
| C | 4.757544079  | 0.873676238  | 4.106322275  | 630.97  | 632.59  | 655.49  | 671.43  | 677.80  | 692.75  |
| H | 5.277748950  | 1.797152488  | 3.875306695  | 700.59  | 705.96  | 707.36  | 708.90  | 711.80  | 712.85  |
| C | 4.655285547  | 0.456313312  | 5.434481076  | 714.75  | 716.35  | 717.40  | 731.25  | 743.76  | 745.41  |
| H | 5.099850301  | 1.059997812  | 6.220194073  | 758.81  | 764.37  | 765.81  | 765.96  | 766.60  | 771.85  |
| C | 3.984102386  | -0.724945134 | 5.753624230  | 778.34  | 779.87  | 791.32  | 866.80  | 868.17  | 871.21  |
| H | 3.905313015  | -1.044722955 | 6.788315930  | 871.89  | 899.61  | 905.68  | 944.35  | 945.92  | 947.54  |
| C | 3.408483951  | -1.490802151 | 4.737047272  | 949.28  | 975.57  | 978.29  | 984.76  | 986.61  | 989.53  |
| H | 2.879479082  | -2.408269027 | 4.978349951  | 989.78  | 1008.12 | 1009.72 | 1010.78 | 1012.00 | 1012.03 |
| C | 3.503610524  | -1.076568638 | 3.408934839  | 1013.10 | 1015.75 | 1016.10 | 1016.87 | 1017.17 | 1017.37 |
| H | 3.039698583  | -1.669319858 | 2.625461156  | 1049.07 | 1050.00 | 1050.82 | 1050.87 | 1058.75 | 1061.43 |
| C | 4.711817603  | 2.409502917  | 1.353065568  | 1094.92 | 1104.48 | 1104.95 | 1109.10 | 1110.25 | 1111.54 |
| C | 6.044144198  | 2.848531977  | 1.429858498  | 1112.34 | 1113.34 | 1114.74 | 1118.66 | 1149.36 | 1163.11 |
| H | 6.858122663  | 2.129993297  | 1.437032572  | 1192.24 | 1192.45 | 1193.09 | 1193.66 | 1200.52 | 1202.66 |
| C | 6.328962740  | 4.211907002  | 1.497662820  | 1211.77 | 1212.24 | 1218.87 | 1219.72 | 1273.29 | 1293.74 |
| H | 7.361457356  | 4.543526418  | 1.559811110  | 1300.52 | 1323.34 | 1324.57 | 1325.80 | 1328.19 | 1330.15 |
| C | 5.291333711  | 5.145948236  | 1.483214149  | 1332.66 | 1358.54 | 1359.51 | 1363.36 | 1363.50 | 1466.86 |
| H | 5.515842651  | 6.207550998  | 1.532031677  | 1470.36 | 1473.98 | 1474.22 | 1477.59 | 1477.74 | 1503.35 |
| C | 3.966212152  | 4.714142384  | 1.408776099  | 1519.09 | 1522.97 | 1523.08 | 1525.38 | 1525.43 | 1612.65 |
| H | 3.156987847  | 5.438477669  | 1.401996452  | 1619.71 | 1625.51 | 1625.77 | 1627.35 | 1627.69 | 1636.70 |
| C | 3.670758104  | 3.352194040  | 1.345424598  | 1640.52 | 1641.55 | 1641.74 | 1642.30 | 1642.53 | 1941.48 |
| H | 2.637495388  | 3.022932697  | 1.308807371  | 1966.38 | 3172.83 | 3173.59 | 3184.84 | 3186.78 | 3188.64 |
| C | 1.834785943  | -0.339872118 | -2.921123799 | 3190.59 | 3190.99 | 3192.24 | 3192.85 | 3193.91 | 3197.77 |
| C | 0.916758271  | 0.722777517  | -2.819121462 | 3199.59 | 3199.74 | 3200.33 | 3200.61 | 3201.72 | 3203.91 |
| H | 1.072028427  | 1.506439251  | -2.081979001 | 3205.51 | 3212.37 | 3213.63 | 3213.81 | 3214.47 | 3214.57 |
| C | -0.196352112 | 0.779608660  | -3.654603010 | 3215.34 | 3224.04 | 3224.50 | 3237.31 | 3238.16 | 3388.33 |
| H | -0.890680067 | 1.610731819  | -3.571783279 | 3399.49 | 3472.76 | 3488.05 |         |         |         |
| C | -0.420892059 | -0.233381816 | -4.590527749 |         |         |         |         |         |         |
| H | -1.292301707 | -0.193411575 | -5.237408045 |         |         |         |         |         |         |
| C | 0.473828714  | -1.297747204 | -4.687102203 |         |         |         |         |         |         |
| H | 0.300788671  | -2.091423516 | -5.407926515 |         |         |         |         |         |         |
| C | 1.597105989  | -1.354483060 | -3.858726644 | -360.69 | 22.80   | 28.12   | 37.01   | 40.52   | 48.41   |
| H | 2.276713883  | -2.194394419 | -3.945294694 | 49.99   | 53.43   | 60.71   | 60.87   | 64.02   | 70.31   |
| C | 4.142101168  | -1.945684347 | -2.066201114 | 78.36   | 81.18   | 87.65   | 92.64   | 93.87   | 107.72  |
| C | 4.233547856  | -2.970430281 | -1.114937734 | 113.69  | 142.71  | 148.65  | 152.43  | 158.95  | 178.76  |
| H | 3.803407601  | -2.833078108 | -0.128631477 | 196.68  | 211.40  | 220.05  | 220.24  | 221.10  | 235.39  |
| C | 4.910013472  | -4.154946761 | -1.414200240 | 236.38  | 240.84  | 243.53  | 259.80  | 260.95  | 269.32  |
| H | 4.974858715  | -4.939810526 | -0.666346055 | 322.03  | 331.31  | 343.69  | 359.11  | 372.96  | 409.11  |
| C | 5.505290747  | -4.327254203 | -2.663962538 | 409.77  | 416.52  | 416.83  | 433.50  | 439.84  | 441.55  |
| H | 6.027603144  | -5.250307664 | -2.897041217 | 458.22  | 460.46  | 465.09  | 503.10  | 508.28  | 508.88  |
| C | 5.436506960  | -3.302426889 | -3.611826848 | 509.95  | 524.64  | 530.12  | 533.37  | 547.97  | 559.14  |
| H | 5.907584870  | -3.424768616 | -4.582816344 | 574.06  | 628.67  | 629.40  | 630.44  | 630.99  | 631.69  |
| C | 4.765151853  | -2.117181927 | -3.315810045 | 675.59  | 679.73  | 679.95  | 695.50  | 703.00  | 707.63  |
| H | 4.727427495  | -1.324850164 | -4.058242296 | 709.72  | 710.59  | 711.99  | 712.30  | 716.33  | 717.36  |
|   |              |              |              | 730.25  | 735.86  | 745.60  | 759.96  | 767.10  | 767.32  |
|   |              |              |              | 768.21  | 768.50  | 778.99  | 780.99  | 792.72  | 838.90  |
|   |              |              |              | 851.61  | 868.52  | 869.22  | 873.52  | 875.22  | 900.66  |
|   |              |              |              | 907.63  | 945.95  | 948.77  | 949.82  | 954.60  | 955.34  |
|   |              |              |              | 975.98  | 979.03  | 989.42  | 990.22  | 992.39  | 992.85  |
|   |              |              |              | 994.72  | 1009.81 | 1010.65 | 1011.56 | 1012.33 | 1012.63 |
|   |              |              |              | 1013.37 | 1017.44 | 1017.59 | 1018.02 | 1018.82 | 1019.02 |
|   |              |              |              | 1050.59 | 1050.83 | 1051.93 | 1052.06 | 1060.39 | 1063.18 |
|   |              |              |              | 1092.67 | 1107.02 | 1108.36 | 1111.60 | 1111.94 | 1113.51 |

3-TS - Oxidative addition TS

Table S4. Vibrational frequencies of all structures in Table S2.

3 - Rh(I)BIPHEP bis-acetylene complex

17.17 30.39 36.92 39.80 42.30 45.82



1113.70 1114.35 1114.81 1117.49 1150.43 1163.65  
 1193.46 1194.51 1195.10 1195.32 1201.00 1201.86  
 1214.74 1215.07 1219.80 1220.35 1275.95 1295.64  
 1301.40 1325.00 1326.23 1328.36 1329.62 1331.54  
 1333.42 1361.46 1362.86 1365.12 1365.45 1468.71  
 1472.68 1475.10 1475.74 1478.64 1479.27 1502.68  
 1518.90 1523.69 1524.20 1525.02 1525.05 1612.83  
 1620.29 1626.20 1627.37 1628.21 1629.25 1638.22  
 1640.77 1641.56 1643.05 1643.43 1643.80 1686.87  
 1790.03 3182.48 3182.72 3186.55 3186.73 3191.64  
 3192.42 3192.60 3192.74 3193.21 3193.51 3200.31  
 3200.74 3200.93 3201.35 3201.66 3201.79 3207.73  
 3207.79 3212.38 3212.66 3212.83 3213.81 3214.52  
 3215.02 3222.85 3223.43 3226.44 3227.04 3297.41  
 3300.41 3343.79 3347.15

=====  
**4 - Rh-(III)-BIPHEP Rhodacyclopentadiene**  
 =====

18.90 28.41 33.24 36.68 41.77 43.96  
 50.11 51.69 56.55 59.53 63.25 64.57  
 75.88 80.42 84.31 93.66 107.41 115.24  
 132.98 144.22 152.97 159.16 197.22 200.22  
 210.82 215.51 223.89 229.20 239.45 244.17  
 256.98 261.03 263.44 292.60 339.23 355.28  
 363.74 388.77 407.42 410.50 412.58 415.04  
 423.21 435.96 442.75 451.80 456.57 460.04  
 462.88 498.76 504.49 509.58 513.98 521.76  
 533.01 545.50 564.52 573.07 609.72 627.56  
 628.79 629.58 630.01 630.90 656.49 673.63  
 692.77 703.02 705.60 709.25 710.56 711.33  
 713.55 716.33 721.71 750.09 753.25 762.35  
 765.07 766.59 769.14 770.56 779.76 782.44  
 791.64 792.49 867.96 868.87 871.77 872.50  
 890.93 902.00 906.69 933.15 944.01 946.51  
 952.82 959.69 976.29 976.72 981.69 988.48  
 989.73 992.58 996.72 1008.88 1011.34 1011.68  
 1012.14 1012.18 1014.46 1015.16 1017.56 1019.78  
 1021.25 1021.67 1047.74 1050.52 1050.78 1051.98  
 1059.63 1063.40 1078.20 1091.87 1093.41 1107.96  
 1108.72 1110.12 1111.43 1113.68 1114.87 1116.42  
 1117.79 1119.71 1149.75 1161.72 1194.62 1195.05  
 1196.19 1196.40 1201.06 1203.91 1212.75 1217.32  
 1220.36 1222.96 1242.38 1266.32 1292.54 1298.73  
 1321.49 1326.24 1328.22 1329.71 1330.15 1332.26  
 1333.53 1361.37 1365.31 1366.15 1368.53 1464.34  
 1469.63 1476.73 1476.85 1478.19 1478.35 1500.54  
 1516.32 1523.97 1524.23 1525.30 1525.35 1564.39  
 1610.92 1617.07 1618.23 1625.18 1626.11 1626.92  
 1629.26 1635.96 1637.96 1640.38 1640.99 1641.03  
 1643.25 3140.70 3152.49 3165.98 3167.75 3168.90  
 3171.48 3186.80 3189.84 3191.34 3191.39 3193.41  
 3194.40 3195.32 3198.23 3199.26 3199.38 3201.58  
 3202.40 3203.85 3208.16 3209.36 3209.56 3211.17  
 3211.60 3212.54 3215.52 3215.79 3216.78 3218.11  
 3218.35 3225.45 3234.32

=====  
**5 - Rhodacyclopentadiene, aldehyde adduct**  
 =====

17.74 25.90 28.34 33.23 41.09 44.94  
 48.22 53.89 58.42 61.23 65.31 68.52

73.93 76.04 77.51 84.28 85.49 97.60  
 102.15 112.71 126.96 134.43 142.25 148.46  
 153.80 163.58 178.88 191.72 203.05 213.95  
 217.58 219.12 226.67 229.01 239.03 243.16  
 254.14 257.62 260.43 265.83 330.24 338.26  
 353.89 363.75 389.82 407.85 412.33 414.39  
 416.47 422.84 438.19 442.55 458.34 459.24  
 462.93 475.71 503.49 510.41 512.97 513.65  
 520.29 525.83 533.08 542.50 564.38 573.94  
 604.27 626.81 629.24 629.91 630.23 631.58  
 668.79 673.13 689.87 700.72 706.64 709.08  
 709.33 710.41 711.47 714.99 718.44 749.79  
 761.59 764.98 765.81 766.80 769.39 771.10  
 776.43 779.64 790.77 793.10 794.40 863.41  
 868.00 871.46 876.85 897.57 900.09 904.87  
 911.01 940.39 943.70 949.37 955.57 956.90  
 975.50 978.42 985.47 987.54 987.58 994.19  
 997.74 1005.13 1008.97 1010.58 1011.68 1012.57  
 1012.94 1013.70 1015.72 1016.51 1018.27 1018.67  
 1043.76 1050.24 1051.79 1053.20 1056.48 1058.17  
 1085.66 1092.02 1103.88 1106.26 1108.40 1110.96  
 1111.76 1112.93 1113.41 1114.70 1115.61 1117.78  
 1134.69 1148.27 1156.11 1160.50 1192.86 1193.60  
 1194.15 1195.69 1199.65 1201.77 1213.04 1217.27  
 1222.52 1224.12 1248.90 1267.42 1292.89 1298.59  
 1320.28 1324.98 1325.84 1327.88 1328.53 1333.60  
 1344.29 1360.47 1362.29 1368.14 1369.48 1393.89  
 1438.58 1464.91 1465.97 1468.69 1473.28 1475.23  
 1475.88 1476.89 1478.91 1499.29 1514.87 1523.41  
 1524.43 1527.27 1528.11 1566.07 1610.75 1616.62  
 1621.72 1625.38 1626.25 1627.10 1629.18 1635.64  
 1637.54 1641.32 1641.66 1642.34 1644.67 1765.02  
 3007.41 3041.37 3095.74 3134.13 3146.71 3158.19  
 3164.15 3172.99 3183.02 3186.03 3187.99 3188.88  
 3190.15 3191.27 3192.40 3194.01 3194.31 3195.23  
 3198.02 3199.11 3199.97 3201.62 3203.26 3204.59  
 3209.64 3210.49 3212.25 3212.61 3213.43 3215.45  
 3220.27 3220.55 3220.84 3222.90 3237.34 3243.71

=====  
**5-TS - Aldehyde insertion TS**  
 =====

-316.49 18.08 24.56 29.04 31.30 38.86  
 47.93 50.32 53.38 59.55 61.04 65.83  
 66.22 75.88 76.55 83.12 89.12 95.90  
 105.23 113.47 130.60 144.56 151.58 160.85  
 162.70 191.62 201.35 211.77 215.05 222.50  
 224.74 229.74 231.99 232.46 239.94 246.54  
 253.66 263.35 265.66 338.11 352.21 362.09  
 366.96 382.43 408.27 411.70 416.87 417.36  
 425.41 436.45 439.67 447.26 456.11 459.51  
 468.04 483.29 501.88 509.21 513.47 516.75  
 523.74 531.83 542.02 550.15 563.79 572.80  
 611.90 625.89 627.12 629.09 630.07 630.61  
 674.23 691.51 698.82 707.22 708.61 709.65  
 711.13 714.16 715.43 716.60 728.18 749.22  
 762.31 765.22 765.96 766.36 768.16 779.86  
 783.34 792.85 809.94 863.94 866.36 866.77  
 870.66 871.70 900.08 901.99 907.44 930.70  
 944.56 946.43 947.83 949.59 952.24 975.97  
 981.89 986.69 988.40 988.80 991.50 992.57  
 1005.96 1009.06 1010.68 1011.13 1013.05 1014.18

1015.98 1016.45 1016.71 1017.42 1019.07 1029.43  
 1045.22 1046.78 1050.18 1051.96 1060.43 1065.10  
 1077.27 1095.17 1106.17 1107.62 1107.98 1109.22  
 1110.09 1112.16 1113.51 1114.42 1115.83 1120.95  
 1126.03 1137.64 1149.80 1162.11 1192.88 1194.18  
 1194.55 1194.89 1200.55 1203.79 1213.84 1218.06  
 1220.46 1221.53 1266.66 1267.48 1292.34 1299.17  
 1318.74 1323.29 1325.65 1327.07 1330.07 1331.02  
 1334.17 1362.03 1362.58 1364.78 1366.25 1367.57  
 1405.33 1449.21 1464.36 1468.94 1473.93 1475.85  
 1476.23 1478.56 1483.38 1489.55 1503.14 1519.22  
 1523.76 1524.63 1524.72 1525.71 1526.84 1563.71  
 1612.87 1619.09 1624.57 1626.46 1627.53 1627.86  
 1638.33 1639.52 1640.18 1641.58 1643.09 1643.58  
 3038.96 3073.54 3116.44 3135.07 3157.32 3162.95  
 3166.76 3170.37 3172.33 3183.94 3187.88 3188.80  
 3189.67 3191.81 3192.12 3193.38 3196.37 3197.50  
 3198.98 3199.18 3200.52 3202.28 3204.69 3207.63  
 3211.61 3212.94 3213.08 3213.18 3213.97 3216.40  
 3218.26 3219.29 3221.76 3224.91 3228.52 3232.06

6 - Aldehyde insertion product - Rhodacycloheptadiene

15.74 28.12 31.19 33.81 37.59 44.22  
 45.99 50.83 55.56 58.29 61.44 67.14  
 68.00 70.59 77.78 81.83 90.11 103.71  
 111.10 123.48 131.95 153.02 156.27 165.72  
 188.81 204.62 206.86 213.07 220.34 230.13  
 234.61 240.73 247.41 253.51 258.56 262.59  
 269.41 275.68 315.53 335.54 355.85 371.62  
 374.70 407.05 409.63 413.60 415.80 426.13  
 435.35 442.00 447.49 455.63 462.44 464.82  
 495.04 505.23 510.38 515.17 517.48 525.26  
 533.77 548.31 559.85 573.31 576.71 628.40  
 628.94 629.86 630.33 631.27 657.39 678.27  
 695.39 700.47 706.16 708.77 710.43 711.96  
 713.04 718.28 718.54 722.68 747.35 762.76  
 764.42 765.27 766.52 768.82 769.59 781.21  
 783.99 793.75 815.33 844.16 860.02 866.76  
 872.01 880.63 903.77 909.99 910.77 927.88  
 944.50 947.87 953.71 962.54 966.83 980.54  
 983.45 985.47 988.68 991.86 1004.30 1009.72  
 1010.59 1011.76 1012.30 1013.13 1014.30 1015.97  
 1016.94 1017.31 1019.56 1019.95 1029.19 1046.25  
 1050.48 1050.94 1052.66 1052.70 1063.74 1066.30  
 1089.82 1094.67 1106.37 1107.97 1110.47 1111.51  
 1113.52 1114.38 1117.39 1119.41 1121.00 1151.57  
 1164.64 1172.18 1188.58 1194.78 1195.83 1196.43  
 1196.79 1201.87 1204.78 1216.68 1220.08 1221.10  
 1224.46 1270.19 1291.06 1299.29 1300.96 1306.45  
 1324.60 1326.91 1327.81 1331.26 1331.98 1332.47  
 1335.01 1353.36 1363.60 1367.74 1369.05 1371.82  
 1408.30 1454.94 1466.21 1470.65 1474.68 1477.88  
 1478.40 1478.75 1499.27 1502.50 1505.18 1516.41  
 1522.40 1525.52 1525.97 1526.47 1611.60 1618.96  
 1621.52 1623.24 1626.37 1628.34 1628.68 1637.79  
 1638.08 1640.13 1641.39 1642.10 1643.35 1695.25  
 2941.89 3035.38 3088.45 3107.85 3123.81 3138.30  
 3159.93 3163.83 3173.10 3181.07 3188.97 3189.72  
 3190.88 3191.87 3194.65 3194.68 3197.84 3199.73  
 3200.07 3200.80 3202.70 3204.98 3207.26 3209.42

3210.61 3211.76 3213.56 3213.95 3214.79 3216.50  
 3216.87 3217.68 3220.02 3224.30 3227.42 3248.61

7 - Rhodacycloheptadiene with acetate, protonated

-9.49 11.53 24.67 31.03 35.15 39.42  
 42.24 50.65 53.93 57.68 59.36 64.46  
 67.74 72.91 76.97 80.91 84.76 89.06  
 95.35 103.72 105.62 114.56 123.32 126.87  
 136.40 154.90 165.78 171.62 181.61 186.07  
 203.21 211.42 221.08 224.13 233.12 236.37  
 245.58 246.35 251.84 256.51 258.86 264.24  
 268.29 273.93 279.12 297.57 325.34 332.48  
 341.97 354.54 378.57 410.40 411.34 417.29  
 418.53 424.74 435.14 439.47 440.03 446.31  
 451.82 467.91 469.41 479.28 505.53 508.76  
 514.77 520.85 523.46 529.26 544.55 556.88  
 564.46 575.03 618.85 626.58 628.61 630.60  
 630.69 632.13 633.81 680.09 680.79 693.15  
 698.36 701.07 702.88 708.71 710.25 714.32  
 714.59 716.63 720.41 745.75 759.76 761.65  
 765.77 767.89 769.87 770.90 779.40 782.13  
 793.22 830.90 842.38 863.05 863.61 872.82  
 876.16 897.19 904.49 909.85 946.47 946.89  
 954.38 955.61 959.04 976.04 980.99 984.17  
 987.55 988.89 990.11 996.18 1002.95 1007.20  
 1008.87 1011.27 1011.97 1012.64 1013.02 1013.70  
 1015.78 1016.81 1018.48 1019.30 1022.36 1025.12  
 1030.40 1050.01 1050.20 1051.67 1052.07 1062.17  
 1064.37 1069.34 1093.75 1102.70 1105.33 1108.07  
 1109.77 1110.68 1111.98 1113.65 1115.73 1117.61  
 1119.22 1144.38 1151.12 1164.59 1194.14 1194.63  
 1195.19 1195.99 1201.67 1203.25 1221.36 1222.64  
 1224.92 1225.83 1228.52 1267.10 1274.36 1293.40  
 1300.95 1319.41 1321.48 1323.98 1325.02 1329.10  
 1330.98 1333.31 1353.94 1355.44 1366.51 1369.23  
 1369.79 1370.27 1392.12 1400.80 1423.66 1460.84  
 1464.96 1466.44 1471.47 1474.43 1475.80 1476.95  
 1477.75 1479.83 1499.29 1503.69 1503.89 1516.30  
 1517.97 1525.36 1526.82 1527.90 1528.33 1575.91  
 1610.23 1618.34 1625.55 1625.71 1627.31 1627.81  
 1638.89 1640.57 1640.97 1641.26 1641.77 1642.17  
 1643.14 1722.35 3007.71 3045.75 3061.79 3081.16  
 3116.75 3131.98 3133.09 3146.45 3150.46 3163.60  
 3172.87 3185.49 3188.17 3188.83 3189.69 3190.27  
 3192.70 3193.50 3195.82 3196.85 3199.05 3200.03  
 3200.90 3202.78 3208.78 3209.50 3210.81 3210.82  
 3212.44 3214.41 3215.35 3216.83 3222.87 3226.56  
 3228.09 3233.41 3236.65 3246.45 3247.30 3807.28

7A'-TS - H2 activation TS

-1187.28 8.87 18.43 27.39 32.52 33.73  
 35.97 41.99 48.61 50.32 54.53 58.02  
 63.03 66.13 69.05 71.72 76.41 78.08  
 81.54 86.01 92.04 96.78 100.83 113.75  
 115.23 118.23 130.40 131.66 140.62 151.20  
 155.78 159.96 174.72 187.56 193.44 207.86  
 211.88 220.36 223.86 232.25 237.95 241.96  
 248.17 251.29 252.85 262.59 265.24 267.45

269.71 285.89 312.26 339.48 356.86 366.15  
368.43 393.17 408.27 411.26 412.24 416.95  
423.49 429.02 442.08 445.81 452.49 458.44  
468.92 472.65 492.02 503.60 508.00 514.98  
518.59 525.54 534.39 547.18 550.29 563.44  
571.54 575.73 619.50 627.95 629.18 629.78  
630.21 632.73 646.78 667.44 677.65 681.67  
694.38 702.58 706.48 708.58 709.89 713.26  
715.34 716.32 717.67 732.54 746.94 761.00  
768.89 769.06 769.63 771.49 776.22 778.90  
781.98 787.31 792.39 830.69 868.85 869.62  
873.35 879.53 901.44 906.93 928.18 941.72  
947.13 951.64 952.25 957.03 959.79 977.20  
978.99 982.26 990.85 991.22 991.96 996.48  
1003.05 1004.78 1010.83 1011.21 1011.84 1012.96  
1013.14 1013.48 1016.99 1017.57 1018.00 1018.18  
1024.16 1032.74 1041.33 1048.67 1051.20 1053.05  
1053.37 1061.60 1064.52 1071.32 1096.97 1105.10  
1106.12 1110.20 1111.52 1111.88 1113.62 1114.66  
1116.51 1117.30 1121.73 1151.69 1164.98 1175.15  
1193.50 1193.83 1195.10 1195.40 1202.17 1203.83  
1210.99 1212.40 1215.79 1221.87 1223.66 1227.30  
1236.95 1252.22 1268.77 1278.65 1293.11 1301.72  
1304.55 1319.53 1323.89 1326.01 1328.14 1329.54  
1331.27 1333.14 1334.00 1362.15 1362.95 1365.53  
1372.05 1372.53 1374.43 1394.65 1425.63 1455.54  
1465.23 1466.66 1469.31 1474.99 1475.67 1477.34  
1478.75 1483.11 1487.92 1495.96 1496.62 1503.64  
1504.53 1518.46 1523.75 1524.99 1529.12 1529.39  
1613.38 1620.42 1621.57 1625.69 1627.54 1629.15  
1629.31 1637.95 1641.12 1641.61 1642.49 1644.06  
1644.77 1645.76 1697.07 1702.48 1798.41 3068.97  
3074.78 3077.63 3079.73 3129.15 3138.64 3139.27  
3164.39 3181.70 3187.39 3187.43 3187.61 3189.20  
3191.47 3192.98 3193.87 3194.61 3197.03 3197.83  
3197.99 3199.25 3202.12 3202.39 3203.93 3206.15  
3209.33 3211.72 3211.82 3212.22 3214.79 3215.69  
3218.85 3220.27 3220.69 3223.59 3227.72 3228.14  
3242.20 3244.83 3616.38

=====

**7A'** - rohdacycloheptadiene with acetate and H2 coordinated

=====

12.17 21.02 26.32 29.74 32.49 42.56  
43.74 47.48 53.11 57.49 61.57 62.11  
65.87 69.96 73.68 75.96 80.59 90.76  
96.61 97.92 103.92 108.56 111.45 119.94  
123.86 128.85 133.52 139.00 149.86 157.70  
162.28 172.38 196.01 203.49 209.27 213.42  
222.65 228.22 230.12 236.51 239.81 244.52  
251.70 257.78 264.30 267.57 269.13 280.62  
304.00 337.42 340.10 357.11 364.05 393.47  
405.31 412.90 416.80 417.16 420.82 426.74  
428.24 437.76 447.22 456.16 458.66 466.77  
470.81 498.45 509.00 513.53 517.16 521.69  
525.37 530.85 543.28 547.29 564.13 574.39  
577.47 599.62 617.23 628.97 630.02 631.01  
631.54 631.77 633.58 647.33 675.08 675.96  
693.50 702.03 706.36 708.79 710.53 713.18  
713.91 716.37 718.29 722.79 750.30 762.59  
765.91 766.79 767.91 769.53 776.05 779.27  
780.29 789.40 797.50 818.55 821.00 864.37

872.54 874.34 879.77 897.79 903.67 934.62  
935.60 943.78 947.84 952.25 956.81 958.83  
972.75 973.77 975.69 983.83 987.89 993.65  
994.25 996.92 1002.38 1002.68 1005.68 1010.59  
1010.85 1011.15 1014.22 1015.19 1018.03 1020.96  
1028.57 1031.09 1040.77 1051.06 1052.58 1052.93  
1053.34 1053.40 1060.57 1063.65 1064.67 1097.72  
1107.69 1108.21 1110.41 1110.98 1115.88 1117.03  
1117.49 1118.63 1121.47 1130.73 1139.96 1149.46  
1162.09 1178.80 1191.02 1191.30 1191.61 1191.91  
1199.22 1201.64 1205.54 1207.27 1219.41 1221.15  
1223.01 1226.87 1227.02 1241.32 1267.27 1292.65  
1300.25 1308.29 1319.84 1325.94 1327.49 1329.24  
1330.38 1331.10 1335.01 1349.39 1359.83 1367.12  
1370.17 1371.18 1372.75 1405.44 1437.57 1465.73  
1467.65 1475.02 1475.71 1476.96 1477.41 1478.30  
1481.12 1491.75 1494.29 1505.02 1511.22 1517.88  
1527.99 1528.52 1530.36 1530.73 1613.89 1620.28  
1627.38 1628.76 1629.60 1630.62 1634.30 1640.88  
1643.41 1644.77 1644.94 1645.76 1646.58 1675.60  
1700.09 1824.97 2940.46 3056.17 3056.27 3062.63  
3117.73 3126.25 3129.80 3129.92 3158.46 3160.87  
3173.45 3177.67 3177.90 3178.44 3178.92 3180.40  
3182.60 3184.43 3189.39 3190.60 3191.35 3191.82  
3193.63 3194.89 3200.80 3202.91 3203.05 3203.48  
3206.06 3207.24 3208.31 3211.15 3213.07 3225.02  
3231.29 3235.12 3236.13 3237.25 3242.87 3680.14

=====

**8** - Protonated Rhodacycloheptadienehydride, acetic acid adduct (H2 activation product)

=====

19.16 24.70 31.05 38.99 41.54 44.20  
47.76 49.84 54.10 54.85 60.74 61.65  
67.29 69.64 71.99 79.93 83.58 88.89  
91.92 96.11 100.04 113.27 117.51 127.58  
137.44 145.12 158.07 166.70 169.85 182.14  
190.13 196.90 205.79 210.55 216.79 224.78  
233.95 235.35 239.30 249.38 252.15 257.68  
262.37 263.96 264.93 285.09 331.65 337.17  
354.86 370.95 386.52 408.24 410.75 416.23  
417.99 425.24 429.15 438.36 440.62 449.85  
456.22 459.44 465.00 468.29 484.53 501.83  
514.00 518.56 523.62 529.27 539.53 559.95  
563.06 577.25 588.52 627.83 628.93 630.24  
630.97 631.64 633.14 635.69 677.03 691.82  
699.47 701.84 706.45 707.75 708.50 709.29  
712.11 712.90 717.03 750.17 751.83 760.09  
761.34 768.48 769.23 770.24 774.49 776.62  
779.27 781.10 796.25 827.85 834.87 853.04  
859.60 866.76 868.92 870.34 901.18 903.61  
912.34 913.30 937.70 947.11 948.52 953.88  
976.58 979.48 981.00 982.52 988.98 993.48  
994.25 1009.05 1010.30 1010.54 1010.80 1012.28  
1013.11 1014.37 1014.74 1017.30 1017.60 1017.79  
1018.11 1019.38 1039.28 1039.85 1047.14 1049.97  
1051.32 1052.91 1057.02 1065.02 1071.05 1093.38  
1104.60 1105.51 1107.00 1107.71 1109.69 1111.88  
1112.42 1113.65 1114.20 1118.44 1148.67 1161.36  
1164.18 1191.90 1194.18 1194.46 1194.61 1200.19  
1202.86 1213.70 1219.76 1220.68 1221.99 1261.69  
1268.87 1271.38 1294.30 1298.40 1303.17 1322.20

1324.19 1325.94 1328.12 1329.26 1332.93 1334.83  
 1351.84 1359.43 1362.56 1366.49 1367.80 1380.48  
 1397.40 1418.77 1422.63 1466.21 1469.59 1470.02  
 1472.22 1476.03 1476.54 1477.23 1478.02 1480.69  
 1488.59 1502.78 1508.57 1517.38 1518.88 1523.93  
 1524.39 1525.67 1527.93 1611.22 1613.81 1617.83  
 1625.84 1626.27 1628.07 1629.33 1638.75 1639.33  
 1641.19 1642.00 1642.69 1644.72 1716.11 1721.17  
 2227.38 2982.22 3057.75 3069.00 3081.80 3123.17  
 3129.94 3134.58 3150.26 3153.50 3158.45 3183.17  
 3185.36 3187.37 3187.50 3187.99 3189.67 3190.21  
 3191.13 3192.83 3195.20 3195.22 3197.08 3200.04  
 3201.41 3202.14 3203.10 3206.75 3208.73 3211.99  
 3213.04 3213.27 3213.49 3214.38 3216.80 3221.82  
 3222.20 3233.80 3241.74 3249.43 3352.15 3749.47

9 - Same as structure 12, without acetic acid

15.82 28.75 33.47 36.55 39.95 49.44  
 50.80 53.65 59.11 63.68 65.90 70.21  
 72.16 75.77 84.47 89.87 96.00 101.65  
 107.24 132.09 142.18 147.50 154.00 158.21  
 189.35 197.39 205.34 210.83 216.85 221.84  
 227.04 234.50 238.67 242.60 246.33 258.29  
 262.54 264.26 265.41 325.85 334.25 356.78  
 367.32 373.25 378.74 408.66 410.34 414.57  
 415.36 415.93 429.15 437.38 445.32 452.65  
 457.44 461.94 477.23 506.11 509.38 514.68  
 521.99 528.55 544.20 552.97 560.85 574.21  
 582.94 629.65 630.28 631.34 631.88 632.49  
 677.54 692.33 694.18 701.12 706.21 709.18  
 710.81 710.93 713.51 715.82 716.28 748.05  
 752.12 761.24 765.41 766.80 768.66 769.74  
 770.28 779.05 780.26 791.84 818.39 836.36  
 859.39 865.09 869.18 871.33 879.23 900.26  
 906.40 915.55 944.43 946.08 951.71 960.10  
 962.99 974.92 977.57 986.18 988.01 991.04  
 999.44 1000.64 1008.79 1009.74 1011.90 1012.76  
 1013.16 1014.40 1015.36 1017.08 1017.46 1018.13  
 1020.45 1020.90 1039.88 1051.32 1051.96 1052.16  
 1052.23 1059.61 1064.20 1093.53 1104.98 1106.77  
 1108.97 1110.19 1110.36 1112.04 1113.02 1113.78  
 1115.68 1116.63 1118.52 1134.27 1150.10 1163.01  
 1192.92 1193.94 1194.14 1194.94 1200.76 1202.40  
 1207.45 1217.27 1218.97 1219.26 1220.53 1268.18  
 1271.27 1292.29 1298.48 1300.46 1322.25 1323.30  
 1328.07 1328.20 1329.82 1333.39 1346.24 1362.52  
 1363.43 1363.62 1369.40 1389.31 1427.98 1444.26  
 1466.74 1470.76 1473.82 1476.18 1478.09 1479.18  
 1501.97 1502.16 1507.40 1516.52 1524.40 1524.63  
 1524.87 1528.39 1589.87 1611.38 1619.55 1624.16  
 1624.37 1626.90 1628.56 1629.29 1638.05 1640.87  
 1641.05 1642.62 1643.56 1644.69 2272.49 3049.37  
 3082.58 3122.57 3133.44 3139.59 3146.49 3177.09  
 3180.42 3183.69 3185.14 3187.27 3188.16 3191.25  
 3191.36 3192.95 3193.37 3194.02 3197.28 3199.62  
 3200.28 3200.54 3201.62 3202.31 3207.35 3210.18  
 3210.59 3212.12 3212.82 3214.15 3214.82 3217.94  
 3220.65 3221.24 3225.13 3225.37 3225.50 3802.49

9-TS - Reductive elimination transition state

-837.47 18.08 32.33 34.74 38.80 39.76  
 47.13 49.08 52.26 57.17 63.28 64.57  
 68.53 72.45 75.53 79.69 83.33 86.08  
 90.92 101.58 113.43 124.92 141.95 148.85  
 152.58 166.48 186.49 201.89 208.51 217.40  
 220.90 227.00 234.91 239.32 240.38 251.09  
 257.15 260.06 261.08 265.87 301.24 333.33  
 339.80 357.19 368.66 374.32 403.21 409.63  
 411.57 416.12 416.19 429.67 438.07 441.62  
 454.25 455.78 465.24 473.54 504.57 509.12  
 513.91 520.94 528.06 530.66 546.49 560.70  
 574.73 587.89 627.97 630.24 630.36 631.22  
 631.85 679.16 693.95 695.43 700.72 706.77  
 709.82 710.30 712.11 712.80 716.51 718.65  
 747.82 760.75 765.94 767.88 769.59 770.35  
 772.47 778.56 780.44 791.76 812.92 843.34  
 866.07 869.32 871.08 875.34 879.90 899.79  
 905.72 933.59 946.07 947.20 958.34 960.70  
 972.14 973.91 976.71 985.67 989.17 997.98  
 1001.19 1002.49 1007.78 1008.94 1010.06 1011.70  
 1012.52 1012.89 1016.25 1016.72 1017.49 1019.22  
 1019.54 1023.54 1048.32 1050.83 1051.03 1051.81  
 1051.85 1061.92 1063.28 1092.50 1107.62 1108.77  
 1109.10 1110.36 1110.52 1113.18 1114.27 1116.66  
 1117.33 1118.02 1118.71 1124.50 1150.51 1162.77  
 1192.83 1193.42 1194.77 1195.07 1199.73 1201.97  
 1215.82 1217.66 1220.51 1222.91 1223.75 1273.68  
 1274.20 1292.61 1294.41 1300.45 1323.91 1324.28  
 1327.16 1328.67 1331.07 1331.95 1358.74 1361.95  
 1362.47 1368.84 1370.11 1386.07 1425.53 1442.41  
 1468.65 1471.55 1474.15 1475.03 1477.79 1478.67  
 1501.76 1503.67 1508.45 1517.03 1523.61 1524.44  
 1526.55 1528.96 1603.89 1612.60 1619.31 1624.21  
 1625.46 1625.90 1628.05 1629.36 1638.69 1640.50  
 1640.57 1641.94 1642.81 1643.91 2044.90 3044.73  
 3059.69 3115.82 3132.96 3151.85 3155.17 3175.12  
 3180.42 3184.42 3185.99 3186.10 3189.30 3191.06  
 3191.39 3191.56 3191.69 3195.45 3195.80 3197.42  
 3198.15 3199.33 3201.28 3201.55 3201.95 3206.20  
 3208.57 3211.41 3211.47 3212.08 3212.41 3213.23  
 3214.09 3219.62 3224.03 3225.01 3225.49 3788.52

10 - Product complex

16.23 19.07 31.18 35.92 40.37 42.51  
 42.74 49.23 53.59 57.43 61.83 64.86  
 70.06 71.54 74.83 78.87 85.06 85.90  
 98.55 104.33 122.24 132.22 147.73 150.45  
 171.46 182.22 200.77 209.71 210.95 219.98  
 222.61 234.03 236.35 239.28 244.98 257.98  
 258.65 261.27 265.92 294.78 306.36 333.43  
 357.11 369.66 376.35 401.58 409.90 410.68  
 414.87 415.29 422.97 431.39 439.68 440.61  
 456.19 459.25 460.92 466.86 505.99 508.09  
 512.99 522.95 528.88 538.63 547.46 560.97  
 574.59 629.82 630.03 630.79 631.32 632.37  
 660.06 679.40 694.89 701.90 707.30 709.24  
 710.12 712.09 713.17 717.21 718.20 736.43  
 746.22 760.02 766.72 767.30 768.11 768.60

|         |         |         |         |         |         |
|---------|---------|---------|---------|---------|---------|
| 777.46  | 779.61  | 791.30  | 833.75  | 860.50  | 867.52  |
| 868.41  | 871.86  | 872.33  | 898.90  | 905.43  | 920.74  |
| 944.09  | 947.96  | 949.47  | 950.33  | 956.90  | 964.32  |
| 972.87  | 976.02  | 976.28  | 986.12  | 987.52  | 990.40  |
| 990.95  | 1001.06 | 1006.70 | 1007.70 | 1011.58 | 1011.86 |
| 1012.18 | 1013.32 | 1016.19 | 1016.34 | 1017.19 | 1017.25 |
| 1017.50 | 1046.55 | 1050.75 | 1051.39 | 1051.52 | 1052.51 |
| 1060.83 | 1061.77 | 1084.22 | 1092.12 | 1105.52 | 1108.26 |
| 1109.74 | 1111.06 | 1111.67 | 1111.91 | 1114.56 | 1116.17 |
| 1117.50 | 1128.99 | 1149.00 | 1161.86 | 1183.64 | 1192.70 |
| 1193.32 | 1193.67 | 1193.98 | 1199.13 | 1200.35 | 1211.90 |
| 1216.90 | 1217.53 | 1219.29 | 1238.60 | 1273.38 | 1279.02 |
| 1293.32 | 1296.08 | 1300.42 | 1322.90 | 1324.93 | 1325.48 |
| 1326.60 | 1330.31 | 1334.57 | 1352.08 | 1359.47 | 1362.70 |
| 1363.07 | 1364.20 | 1368.00 | 1410.05 | 1419.42 | 1467.18 |
| 1470.22 | 1470.76 | 1474.23 | 1475.18 | 1477.90 | 1479.23 |
| 1501.38 | 1503.94 | 1508.87 | 1516.46 | 1523.00 | 1523.45 |
| 1523.98 | 1527.72 | 1569.40 | 1611.40 | 1614.63 | 1618.41 |
| 1624.79 | 1626.24 | 1628.00 | 1631.14 | 1636.62 | 1639.32 |
| 1641.22 | 1641.95 | 1642.47 | 1644.54 | 3020.56 | 3042.35 |
| 3115.64 | 3139.03 | 3167.15 | 3173.50 | 3174.63 | 3177.08 |
| 3184.67 | 3185.84 | 3190.19 | 3190.83 | 3191.23 | 3191.37 |
| 3191.52 | 3191.56 | 3191.99 | 3197.98 | 3198.97 | 3199.09 |
| 3200.46 | 3200.48 | 3201.28 | 3209.00 | 3209.84 | 3210.64 |
| 3211.43 | 3211.68 | 3212.82 | 3213.17 | 3214.56 | 3218.96 |
| 3222.70 | 3223.26 | 3225.67 | 3227.53 | 3265.25 | 3815.77 |

**Table S5.** Vibrational frequencies of all structures in Table S3.

**3A - Rh(I)BIPHEP - acetylene + aldehyde adduct**

|         |         |         |         |         |         |
|---------|---------|---------|---------|---------|---------|
| 18.81   | 29.47   | 30.75   | 33.61   | 39.05   | 42.18   |
| 45.29   | 45.69   | 55.32   | 56.03   | 61.56   | 65.67   |
| 67.85   | 70.89   | 75.44   | 80.65   | 85.92   | 91.04   |
| 96.11   | 100.86  | 129.02  | 141.90  | 145.38  | 151.67  |
| 156.39  | 168.50  | 174.74  | 183.49  | 205.85  | 209.73  |
| 215.73  | 217.68  | 223.68  | 232.72  | 237.52  | 239.56  |
| 248.93  | 257.95  | 260.35  | 265.05  | 304.96  | 334.37  |
| 354.25  | 362.15  | 366.46  | 409.64  | 411.34  | 413.56  |
| 417.40  | 429.05  | 438.29  | 441.45  | 453.92  | 458.26  |
| 466.83  | 505.49  | 509.09  | 512.72  | 522.40  | 529.27  |
| 545.51  | 546.68  | 562.38  | 574.19  | 628.86  | 629.73  |
| 630.65  | 631.00  | 632.57  | 652.14  | 676.88  | 693.89  |
| 700.50  | 702.41  | 706.98  | 708.06  | 709.40  | 711.70  |
| 711.94  | 714.57  | 715.60  | 718.13  | 746.23  | 759.57  |
| 764.52  | 766.47  | 767.13  | 769.84  | 773.03  | 777.94  |
| 780.90  | 790.92  | 796.67  | 867.14  | 868.58  | 872.09  |
| 873.34  | 898.52  | 905.33  | 916.88  | 944.26  | 946.65  |
| 948.10  | 950.00  | 973.78  | 977.72  | 986.18  | 986.41  |
| 990.35  | 990.60  | 1007.75 | 1009.39 | 1011.70 | 1012.14 |
| 1012.48 | 1013.11 | 1015.36 | 1015.61 | 1016.40 | 1016.87 |
| 1017.63 | 1049.82 | 1050.09 | 1050.60 | 1051.14 | 1060.07 |
| 1064.69 | 1095.05 | 1103.90 | 1107.61 | 1108.52 | 1109.42 |
| 1111.11 | 1111.52 | 1114.46 | 1115.93 | 1119.64 | 1131.40 |
| 1150.63 | 1150.66 | 1163.26 | 1192.10 | 1192.32 | 1193.26 |

**Table S6.** Computed energy components for the optimized structures of Cycles A and B (see Figure 2 in main text).

|         |         |         |         |         |         |
|---------|---------|---------|---------|---------|---------|
| 1193.35 | 1200.90 | 1202.11 | 1211.78 | 1214.77 | 1217.14 |
| 1219.40 | 1273.87 | 1294.54 | 1301.15 | 1324.45 | 1325.72 |
| 1326.10 | 1328.64 | 1330.67 | 1333.23 | 1359.28 | 1361.00 |
| 1362.09 | 1363.48 | 1389.82 | 1423.38 | 1465.43 | 1467.99 |
| 1470.81 | 1473.87 | 1473.96 | 1474.90 | 1477.56 | 1477.80 |
| 1503.65 | 1519.52 | 1523.57 | 1523.72 | 1524.36 | 1525.15 |
| 1613.61 | 1620.55 | 1624.81 | 1626.10 | 1627.50 | 1628.55 |
| 1639.68 | 1640.93 | 1641.49 | 1641.75 | 1642.02 | 1642.90 |
| 1765.70 | 1877.87 | 3015.29 | 3042.81 | 3100.91 | 3171.25 |
| 3172.55 | 3175.38 | 3182.48 | 3185.18 | 3186.68 | 3190.10 |
| 3190.85 | 3191.19 | 3191.68 | 3191.93 | 3195.91 | 3196.89 |
| 3198.93 | 3199.41 | 3199.96 | 3202.50 | 3202.73 | 3208.27 |
| 3209.88 | 3212.46 | 3212.96 | 3213.15 | 3213.99 | 3214.48 |
| 3217.01 | 3224.60 | 3231.71 | 3233.05 | 3353.95 | 3428.37 |

**3A-TS - Oxidative addition transition state (acetylene-aldehyde coupling)**

|         |         |         |         |         |         |
|---------|---------|---------|---------|---------|---------|
| -390.82 | 19.04   | 30.04   | 30.95   | 36.95   | 41.41   |
| 45.35   | 50.77   | 51.64   | 55.95   | 59.83   | 66.80   |
| 68.22   | 71.43   | 78.13   | 85.24   | 88.40   | 98.05   |
| 104.61  | 116.58  | 134.29  | 148.64  | 150.26  | 161.53  |
| 189.32  | 205.51  | 209.12  | 216.58  | 220.93  | 226.70  |
| 230.74  | 235.51  | 238.46  | 242.96  | 257.70  | 262.57  |
| 265.78  | 280.45  | 293.02  | 332.53  | 358.63  | 366.32  |
| 371.29  | 408.26  | 409.67  | 410.93  | 417.72  | 435.04  |
| 441.01  | 443.99  | 453.83  | 459.37  | 467.65  | 482.12  |
| 508.02  | 510.54  | 511.99  | 523.06  | 524.06  | 530.05  |
| 544.98  | 559.63  | 569.53  | 574.96  | 628.01  | 628.89  |
| 629.13  | 630.45  | 631.27  | 678.31  | 680.22  | 696.08  |
| 703.99  | 707.96  | 709.75  | 710.08  | 711.78  | 715.73  |
| 717.87  | 719.48  | 746.17  | 760.50  | 765.89  | 767.09  |
| 767.30  | 769.25  | 778.83  | 779.18  | 781.84  | 792.44  |
| 848.71  | 867.81  | 868.72  | 872.47  | 875.21  | 901.01  |
| 907.29  | 908.09  | 945.26  | 949.65  | 950.65  | 957.07  |
| 961.83  | 976.14  | 976.83  | 979.01  | 989.78  | 990.49  |
| 996.05  | 996.63  | 1011.35 | 1011.63 | 1011.86 | 1012.23 |
| 1012.37 | 1013.70 | 1017.02 | 1018.36 | 1019.21 | 1019.82 |
| 1021.52 | 1050.31 | 1051.03 | 1051.76 | 1052.82 | 1062.52 |
| 1065.17 | 1077.19 | 1093.08 | 1107.37 | 1109.62 | 1110.89 |
| 1112.42 | 1113.72 | 1114.65 | 1115.38 | 1116.54 | 1118.79 |
| 1140.94 | 1151.53 | 1164.04 | 1194.12 | 1194.43 | 1195.81 |
| 1196.40 | 1201.79 | 1202.44 | 1214.75 | 1217.13 | 1220.83 |
| 1222.75 | 1273.14 | 1293.65 | 1300.91 | 1324.45 | 1326.52 |
| 1327.58 | 1328.13 | 1329.10 | 1332.26 | 1332.97 | 1361.54 |
| 1362.19 | 1365.89 | 1371.06 | 1405.39 | 1447.35 | 1468.35 |
| 1472.02 | 1474.96 | 1476.70 | 1478.76 | 1478.88 | 1489.10 |
| 1497.64 | 1501.63 | 1516.96 | 1523.56 | 1524.36 | 1525.43 |
| 1527.92 | 1612.06 | 1619.21 | 1626.23 | 1626.52 | 1628.18 |
| 1628.43 | 1637.70 | 1640.01 | 1641.32 | 1641.94 | 1642.81 |
| 1643.03 | 1660.89 | 3028.96 | 3050.73 | 3122.65 | 3150.07 |
| 3178.46 | 3182.84 | 3187.28 | 3187.46 | 3191.73 | 3192.96 |
| 3193.43 | 3193.72 | 3194.00 | 3195.44 | 3200.81 | 3201.13 |
| 3201.52 | 3202.21 | 3202.44 | 3203.59 | 3211.50 | 3211.65 |
| 3211.84 | 3212.29 | 3212.76 | 3214.64 | 3217.68 | 3218.16 |
| 3219.01 | 3223.38 | 3224.64 | 3227.00 | 3227.83 | 3283.10 |

|                            | E(SCF)<br>(cc-pVTZ(-f))<br>(eV) | ZPE (eV) | -TS<br>(298.15 K)<br>(eV) | G gas (eV)  | G(Solv) (eV) | $\Delta G(\text{Sol})$ (eV) |
|----------------------------|---------------------------------|----------|---------------------------|-------------|--------------|-----------------------------|
| <b>Acetylene</b>           | -2105.089                       | 0.729    | -0.622                    | -2104.982   | -0.162       | -2105.144                   |
| <b>Acetaldehyde</b>        | -4187.544                       | 1.513    | -0.811                    | -4186.842   | -0.206       | -4187.048                   |
| <b>H<sub>2</sub></b>       | -32.109                         | 0.277    | -0.402                    | -32.234     | 0.000        | -32.234                     |
| <b>Acetic acid</b>         | -6236.155                       | 1.685    | -0.837                    | -6235.306   | -0.339       | -6235.645                   |
| <b>Acetate</b>             | -6220.544                       | 1.308    | -0.892                    | -6220.128   | -2.960       | -6223.087                   |
| <b>Methyl-2-oxoacetate</b> | -9319.855                       | 1.94     | -1.03                     | -9318.948   | -0.34        | -9319.286                   |
| <b><u>Cycle A:</u></b>     |                                 |          |                           |             |              |                             |
| <b>3</b>                   | -63565.808                      | 15.996   | -3.154                    | -63552.966  | -1.612       | -63554.578                  |
| <b>3-TS</b>                | -63565.388                      | 16.061   | -3.006                    | -63552.333  | -1.555       | -63553.888                  |
| <b>4</b>                   | -63567.076                      | 16.201   | -3.004                    | -63553.879  | -1.636       | -63555.515                  |
| <b>5</b>                   | -72887.780                      | 18.238   | -3.411                    | -72872.954  | -1.639       | -72874.5923                 |
| <b>5-TS</b>                | -72887.509                      | 18.212   | -3.442                    | -72872.739  | -1.623       | -72874.362                  |
| <b>6</b>                   | -72888.804                      | 18.331   | -3.341                    | -72873.8145 | -1.546       | -72875.3609                 |
| <b>7A</b>                  | -79113.508                      | 19.699   | -3.664                    | -79097.4737 | -0.841       | -79098.3146                 |
| <b>7A'</b>                 | -79145.216                      | 20.157   | -3.704                    | -79128.7633 | -0.954       | -79129.7177                 |
| <b>7A'-TS</b>              | -79157.258                      | 20.461   | -3.629                    | -79140.4269 | -1.608       | -79142.0344                 |
| <b>8</b>                   | -79157.805                      | 20.618   | -3.757                    | -79140.9448 | -1.574       | -74010.003                  |
| <b>9</b>                   | -72921.495                      | 18.863   | -3.436                    | -72906.0692 | -1.560       | -72907.6294                 |
| <b>9-TS</b>                | -72920.925                      | 18.782   | -3.473                    | -72905.6168 | -1.645       | -72907.2616                 |
| <b>10</b>                  | -72922.405                      | 18.91    | -3.538                    | -72907.033  | -1.653       | -72908.6856                 |
| <b><u>Cycle B:</u></b>     |                                 |          |                           |             |              |                             |
| <b>3A</b>                  | -70780.925                      | 17.215   | -3.483                    | -70767.1933 | -1.660       | -70768.8528                 |
| <b>3A-TS</b>               | -70780.165                      | 17.264   | -3.307                    | -70766.2084 | -1.638       | -70767.8463                 |

**Table S7.** Reaction energy profiles for other pathways considered.

Note: In the following profiles, each structure label has the suffix “s” for small, to denote that these calculations were carried out using a small, truncated model of the BIPHEP ligand in which the four freely-rotatable phenyl groups were replaced by four protons to reduce the computational cost involved in this comprehensive exploration of all possible pathways.

(I) Common pathway upto formation of Rhodacyclopentadiene – migratory insertion assisted by conjugate base of acid.

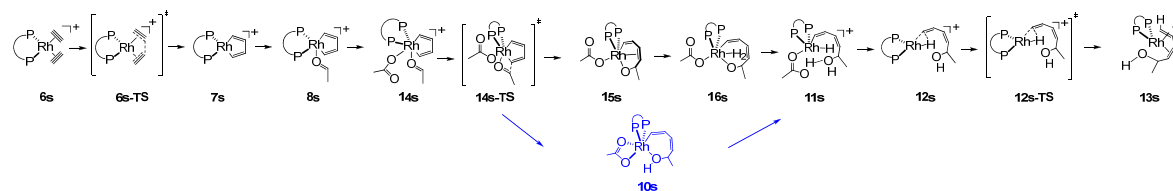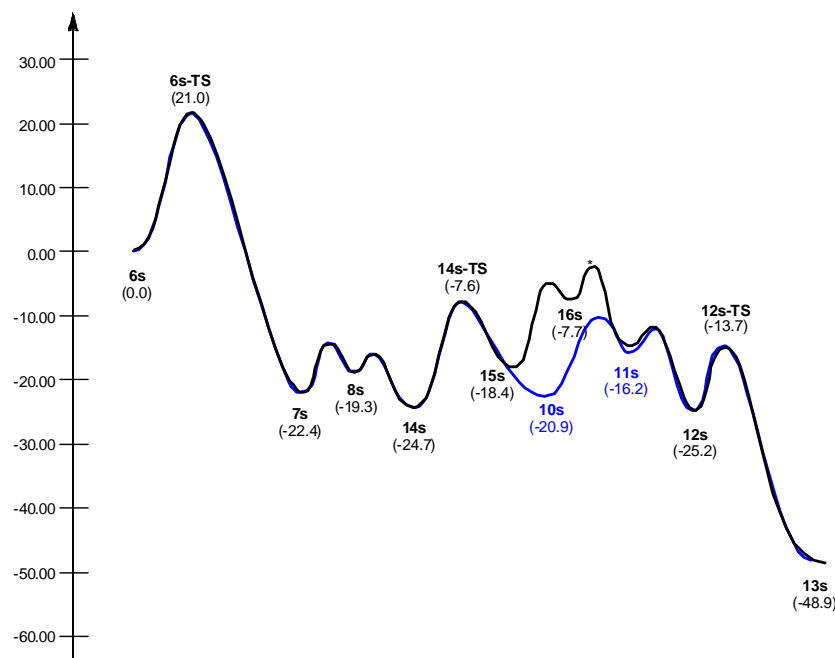

As a comparison with the full BIPHEP model discussed in the main text reveals, the qualitative mechanistic patterns are well reproduced with the small ligand model. However, significant quantitative differences exist. For example, the small phosphine model overestimates the oxidative addition barrier significantly, as **6s-TS** is computed to be 21 kcal mol<sup>-1</sup>, which is much higher than the full model that gave 16 kcal mol<sup>-1</sup>. Examining the transformation **6** → **7**, this disagreement becomes easy to understand: in **6s** the two acetylene moieties bound to Rh cause little to no steric tension, as the small phosphine ligands do not congest the ligand binding sites. However, in **6** the sterically demanding BIPHEP group causes significant sterically induced discomfort. In **6-TS**, on the other hand, the cyclization decreases the steric demand notably, as the two acetylene moieties have become a cyclobutadienyl fragment forming a

metallacycle. Thus, the energetic penalty of having sterically demanding phosphine groups is less pronounced. As a result, the energy difference between **6** and **6-TS** compared to **6s** and **6s-TS** is significantly reduced.

(II) Common pathway upto formation of Rhodacycloheptadiene – protonolysis vs. H<sub>2</sub> activation.

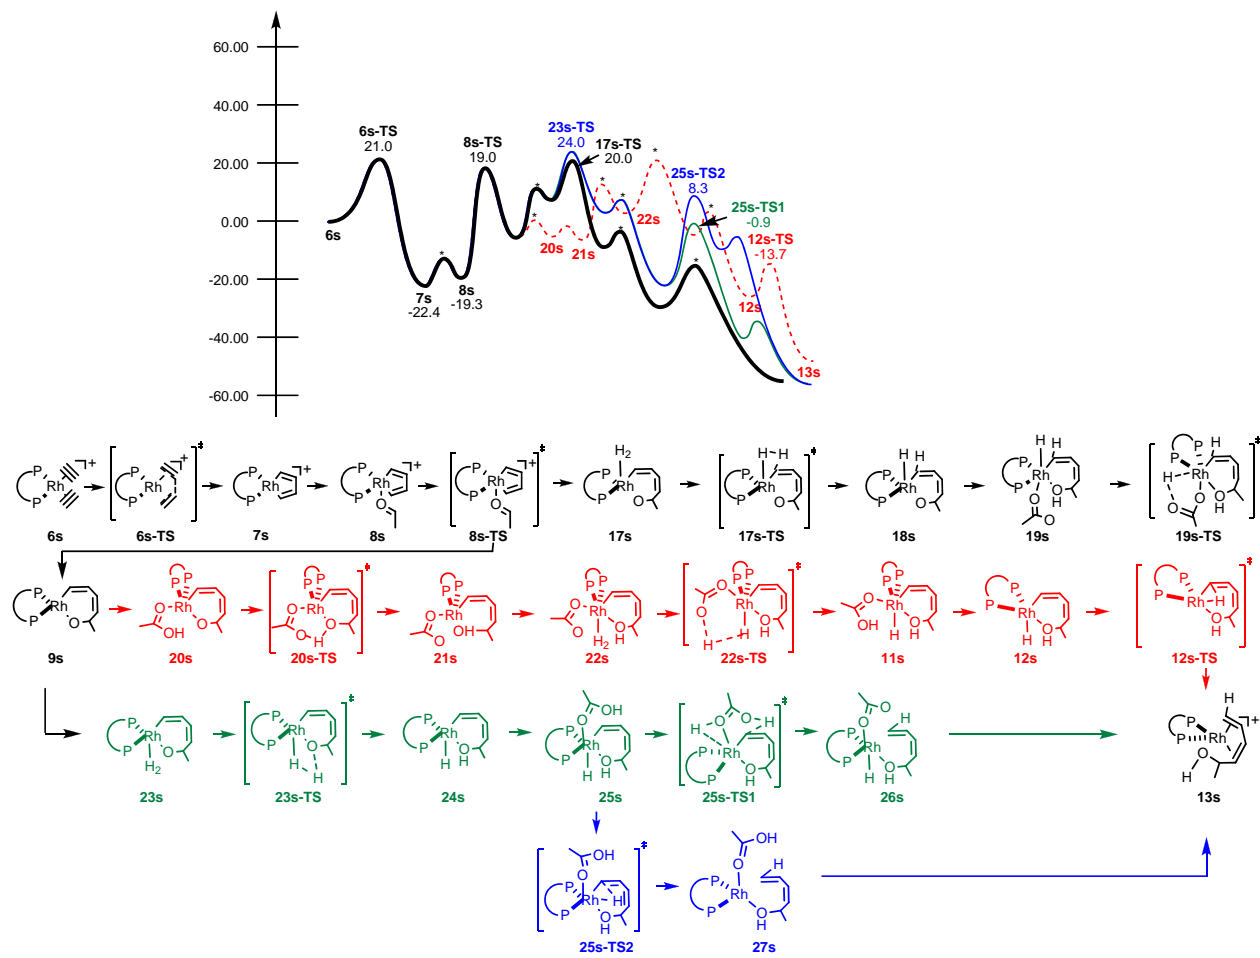



(III) Common pathway upto formation of Rhodacyclopentadiene - migratory insertion vs.  $H_2$  activation.

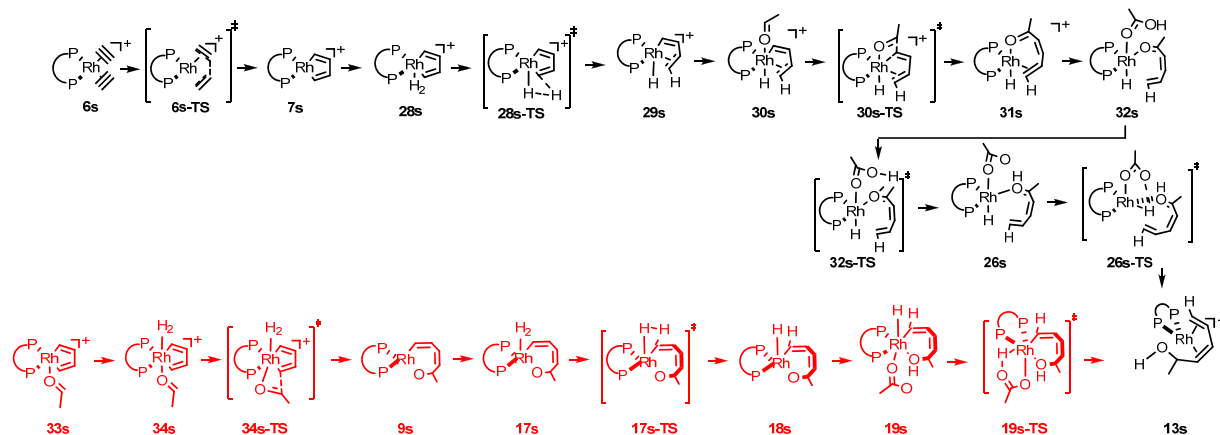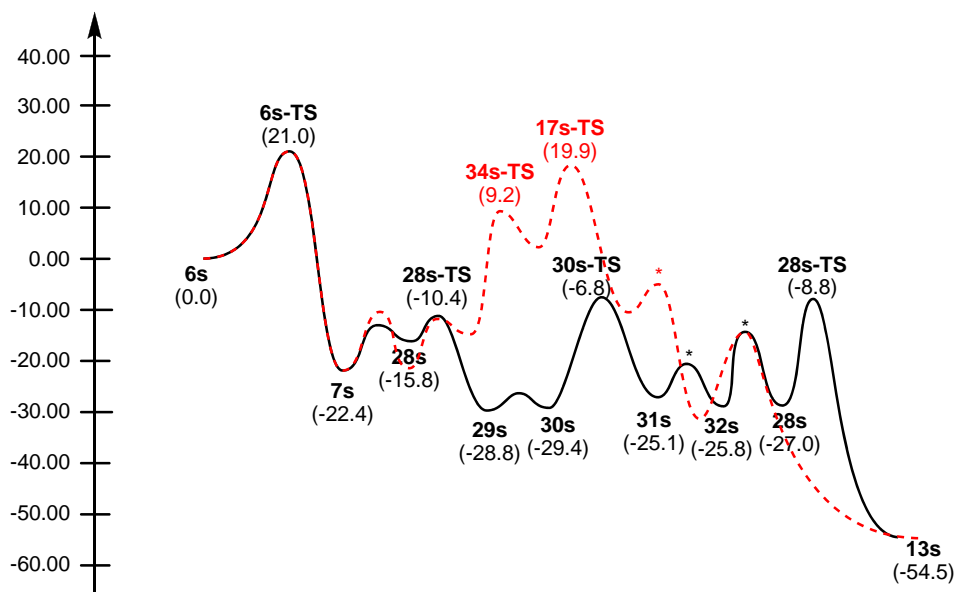

Supplement: NIHMS154729-supplement-2_si_002.pdf [file NIHMS154729-supplement-2_si_002.pdf]
